1 **Modulation of huntingtin degradation by cAMP-dependent protein kinase A (PKA)**  
2 **phosphorylation of C-HEAT domain Ser2550**

3

4 Yejin Lee<sup>1,2,3</sup>, Hyeongju Kim<sup>1</sup>, Douglas Barker<sup>2,3</sup>, Ravi Vijayvargia<sup>2,3+</sup>, Ranjit Singh Atwal<sup>2, 3^</sup>,  
5 Harrison Specht<sup>4</sup>, Hasmik Keshishian<sup>4</sup>, Steven A Carr<sup>4</sup>, Ramee Lee<sup>5</sup>, Seung Kwak<sup>5</sup>, Kyung-gi  
6 Hyun<sup>2,3</sup>, Jacob Loupe<sup>2,3</sup>, Marcy E. MacDonald<sup>2,3</sup>, Ji-Joon Song<sup>1\*</sup>, Ihn Sik Seong<sup>2, 3\*</sup>

7

8 <sup>1</sup>Department of Biological Sciences, KI for the BioCentury, Korea Advanced Institute of Science  
9 and Technology (KAIST), Daejeon 34141, Korea

10 <sup>2</sup>Molecular Neurogenetics Unit, Center for Genomic Medicine, Massachusetts General Hospital,  
11 Boston, MA 02114, USA

12 <sup>3</sup>Department of Neurology, Harvard Medical School, Boston, MA 02114, USA

13 <sup>4</sup>Broad Institute of MIT and Harvard, 7 Cambridge Center, Cambridge, MA, USA

14 <sup>5</sup>CHDI Management/CHDI Foundation, Princeton, NJ 08540 USA

15

16 <sup>^</sup> Current Address: Department of Pharmaceutical Sciences, University of Toronto, Toronto  
17 Ontario, M5S 3M2 Canada

18 <sup>+</sup>Current Address: Department of Biochemistry, The Maharaja Sayajirao University of Baroda,  
19 Vadodara, Gujarat, 390 002, India

20 <sup>\*</sup>To whom correspondence should be addressed: J-J.S. ([songj@kaist.ac.kr](mailto:songj@kaist.ac.kr)), I.S.S.  
21 ([iseong@mgh.harvard.edu](mailto:iseong@mgh.harvard.edu))

22 **ABSTRACT**

23 Huntington's disease (HD) is a neurodegenerative disorder caused by an inherited unstable *HTT*  
24 CAG repeat that expands further, thereby eliciting a disease process that may be initiated by  
25 polyglutamine-expanded huntingtin or a short polyglutamine-product. Phosphorylation of selected  
26 candidate residues is reported to mediate polyglutamine-fragment degradation and toxicity. Here  
27 to support the discovery of phospho-sites involved in the life-cycle of (full-length) huntingtin, we  
28 employed mass spectrometry-based phosphoproteomics to systematically identify sites in purified  
29 huntingtin and in the endogenous protein, by proteomic and phospho-proteomic analyses of  
30 members of an HD neuronal progenitor cell panel. Our results bring total huntingtin phospho-sites  
31 to 95, with more located in the N-HEAT domain relative to numbers in the Bridge and C-HEAT  
32 domains. Moreover, phosphorylation of C-HEAT Ser2550 by cAMP-dependent protein kinase  
33 (PKA), the top hit in kinase activity screens, was found to hasten huntingtin degradation, such that  
34 levels of the catalytic subunit (PRKACA) were inversely related to huntingtin levels. Taken  
35 together these findings highlight categories of phospho-sites that merit further study and provide  
36 a phospho-site kinase pair (pSer2550-PKA) with which to investigate the biological processes that  
37 regulate huntingtin degradation and thereby influence the steady state levels of huntingtin in HD  
38 cells.

39

40

41

42 **Keywords**

43 Huntington's disease, kinase, huntingtin degradation

## 44 INTRODUCTION

45 Huntington's disease (HD) (MIM 143100) is a dominantly inherited brain disorder, featuring  
46 characteristic neurodegeneration and motor, cognitive and behavioral clinical signs (McColgan &  
47 Tabrizi, 2018). The root genetic cause of HD is an expanded CAG triplet repeat in the *Huntingtin*  
48 gene (*HTT*) that extends a polyglutamine segment in huntingtin ("A novel gene containing a  
49 trinucleotide repeat that is expanded and unstable on Huntington's disease chromosomes. The  
50 Huntington's Disease Collaborative Research Group," 1993), an HEAT (Huntingtin, Elongation  
51 factor 3, protein phosphatase 2A regulatory subunit PR65/A and target of rapamycin TOR1) repeat  
52 protein (Andrade & Bork, 1995). For individuals inheriting expansions in the fully penetrant range  
53 (40 or more repeats), the age at onset is hastened with increasing size of the expanded repeat  
54 (Hendricks et al., 2009; Lee et al., 2012).

55 Genetic studies with HD individuals support a pathogenic process leading to onset that involves  
56 further expansion of the inherited expanded repeat in brain cells over time until a critical threshold-  
57 length is reached, whereupon a process damaging to target neurons is initiated (Hong et al., 2021).  
58 The toxicity-mechanism(s) is not known but may involve an impact of the threshold-length repeat  
59 at the level of the mutant huntingtin protein or an aggregation-prone *HTT* exon1 encoded  
60 polyglutamine product, for example generated by exon 1-missplicing (Sathasivam et al., 2013).

61 Therapeutic strategies currently in trials aim to lower mutant huntingtin levels by *HTT*-silencing  
62 (Marxreiter, Stemick, & Kohl, 2020; Tabrizi, Ghosh, & Leavitt, 2019). However, understanding  
63 the role of posttranslational modification (PTM), particularly phosphorylation, in regulating  
64 huntingtin turnover (i.e. the balance between degradation and replacement synthesis), has also  
65 been proposed as route to lowering a toxicity-provoking entity (reviewed in (Lontay, Kiss, Virag,  
66 & Tar, 2020; Sambataro & Pennuto, 2017)). Investigations, based on predicated kinase sites within

67 amino terminal (polyglutamine-containing) fragments of the protein, have identified several  
68 kinases, including I $\kappa$ B kinase (IKK)/TANK-binding kinase 1 (TBK1), Nemo-Like Kinase (NLK),  
69 and AKT/SGK kinases, phosphorylating serine residues S13/S16, S120 and S421, respectively,  
70 that modulate N-terminal polyglutamine-fragment degradation and toxicity (Hegde et al., 2020;  
71 Jiang et al., 2020; Kratter et al., 2016; Thompson et al., 2009). Phosphorylation status at those  
72 same IKK and NLK sites near the amino terminus is also implicated in modulating endogenous  
73 huntingtin levels (Jiang et al., 2020; Thompson et al., 2009). The advent of systems to express and  
74 purify (full-length) human huntingtin, with different polyglutamine segments (Huang et al., 2015;  
75 Kim, Hyun, Lloret, Seong, & Song, 2021; Vijayvargia et al., 2016), now facilitates the delineation  
76 of huntingtin's HEAT repeat domain structure (Guo et al., 2018; Harding et al., 2021; T. Jung et  
77 al., 2020) and the discovery of residues that can be phosphorylated (phospho-sites) in the context  
78 of the entire protein (Huang et al., 2015; T. Jung et al., 2020; Ratovitski et al., 2017; Schilling et  
79 al., 2006). In addition, databases are also accruing phospho-sites identified on peptides derived  
80 from endogenous huntingtin detected in proteomic and phospho-proteomic studies of different cell  
81 and tissue types.

82 Here, building on previous studies with purified huntingtin, we have used unbiased approaches to  
83 delineate huntingtin phospho-sites, assessing the impact of polyglutamine length, thereby  
84 augmenting knowledge of this PTM in the context of the endogenous protein and making the  
85 unexpected discovery of a phospho-site/kinase pair that can modulate the steady-state level of  
86 huntingtin in growing cells.

87

## 88 **RESULTS**

### 89 **Truncating huntingtin exposed N-HEAT domain phosphorylation sites**

90 Structural analyses of purified human huntingtin/HAP-40 complex has delineated three main  
91 huntingtin structural domains, called N-HEAT, Bridge and C-HEAT (Guo et al., 2018) (Figure  
92 1A), though the floppy ‘unstructured’ portions of the protein (~25%) remain unresolved (S.Table  
93 1). The majority of the 16 phospho-sites that we previously identified by mass spectrometry (LC-  
94 MS/MS) of huntingtin purified from our Baculovirus Sf9 insect cell expression system (T. Jung et  
95 al., 2020) are in the Bridge (5 sites) and C-HEAT (7 sites) domains, with relatively few in the large  
96 N-HEAT domain (4 sites) (Figure 1B), though the latter has many predicted kinase target sites.  
97 This distribution is consistent with Cryo-EM and biophysical analyses of purified huntingtin  
98 showing that the amino-terminal region is in close proximity with the C-HEAT region, such that  
99 the polyglutamine segment appears ‘buried’ (T. Jung et al., 2020). Consequently to discover N-  
100 HEAT sites we performed LC-MS/MS on three truncated human huntingtin products purified from  
101 Sf9 insect cell extracts. Seven of the eight phospho-sites identified with the ~200 kDa product  
102 (C1213-3144) were a subset of sites reported for purified huntingtin (1-3144), most in unresolved  
103 regions in the Bridge and C-HEAT domains, and one new site (Ser1215-p) near the terminus of  
104 the product (Figure 1B, S.Table 1, S.Table 2). By contrast, across all polyglutamine lengths (23-,  
105 46-, 78-residues), analyses of the ~150 kDa product (N-1192) and smaller ~60 kDa product (N-  
106 589) together disclosed 20 phospho-sites; 3 reported with purified huntingtin and 17 not detected  
107 in the context of the entire purified protein, nearly all in N-HEAT locations not resolved in the  
108 cryoEM huntingtin/HAP-40 structure (Figure 1B, S.Table 1, S.Table 2).

109 Seven of the N-HEAT phospho-sites were not reported in a phospho-site aggregation-database  
110 (PhosphoSitePlus (Hornbeck et al., 2015)) but 20 of the sites had been reported previously, as had  
111 many other N-HEAT residue phospho-sites, a number of which were detected in high-throughput  
112 proteomic (mainly cancer cell) studies. Since the latter implied an ‘openness’ of the N-HEAT

113 domain in endogenous huntingtin, we set out to systematically discover endogenous huntingtin  
114 phospho-sites in neuronal progenitor cells (NPC), a cell type more relevant to HD.

115

### 116 **Proteomic NPC survey identified N-HEAT endogenous huntingtin phosphosites**

117 We conducted an LC-MS/MS discovery survey, utilizing 12 members of an HD NPC panel with  
118 *HTT* CAG repeat alleles in the normal (<36 units) and expanded (>39 repeat) ranges. The strategy,  
119 designed with duplicates and cross-extract pooled reference controls (24 fractions in total) is  
120 depicted schematically in S.Figure 1 and described in the Methods section. Principle component  
121 analysis (PCA) revealed that variation in protein abundance levels (normalized to pooled reference  
122 control) (S.Figure 2) did not particularly distinguish NPC with *HTT* CAG repeats in the normal  
123 (non-HD) range (17-33 units) (hNPC.01 through hNPC.05) from those with repeats in the  
124 expanded HD-causing range (42-72 units) (hNPC 06 through NPC.11). One outlier NPC  
125 (hNPC.12), which grows slowly, having an extreme ~180-220 CAG repeat, was excluded from  
126 subsequent analyses. As illustrated in S.Figure 3, the huntingtin-derived peptides detected in  
127 hNPC.01 through hNPC.11 (38.14% total huntingtin coverage) (S.Table 3) were located in  
128 structurally resolved and unresolved regions of the N-HEAT, Bridge and C-HEAT domains. The  
129 peptide abundance across the different NPC did not vary in an obviously systematic manner with  
130 CAG repeat length.

131 In contrast to the broad huntingtin peptide-coverage, the 26 huntingtin phospho-sites (22 phospho-  
132 serine and 4 phospho-threonine) identified across the eleven NPC (S.Table 3) are located (in the  
133 primary amino acid sequence) in clusters (Figure 2). The vast majority (21/26; 81%) lie within  
134 unresolved regions of the protein (S.Table 1), mainly in the N-HEAT domain (16/26), whereas  
135 few mapped to structured portions (N-HEAT four; C-HEAT one). Despite the anti-tyrosine

136 antibody column enrichment step, no endogenous huntingtin phospho-tyrosine peptide sites were  
137 detected. The abundance of the identified phospho-site peptides relative to the reference control,  
138 was not evidently associated with *HTT* CAG size, implying that any impact of the length of the  
139 polyglutamine segment is subtle relative to the influence of other factors that determine the pattern  
140 of huntingtin phosphorylation in NPC.

141 Comparison of these 26 phospho-sites with the previously identified endogenous huntingtin  
142 phospho-sites reported in proteomic studies  
143 (<https://www.phosphosite.org/proteinAction.action?id=1292&showAllSites=true> (Hornbeck et al.,  
144 2015)), when mapped onto the huntingtin/Hap40 domain structure coordinates (S.Table 1; S.Table  
145 4), revealed a total of 67 endogenous huntingtin phospho-sites: 43 N-HEAT (35 reported plus 8  
146 new from this study), 9 Bridge (4 this study all reported previously) and 15 C-HEAT (14 reported  
147 plus 1 new from this study). The distribution underscored the relative richness of phospho-sites in  
148 the N-HEAT domain, which notably included phospho-sites detected with short N-terminal exon1  
149 huntingtin fragment (Aiken et al., 2009; Chiki et al., 2021; Hegde et al., 2020) (S.Table 4) and the  
150 comparative paucity of phospho-sites in the large C-HEAT domain.

151

## 152 ***In vitro* screens identified PKA as the top kinase phosphorylating purified huntingtin**

153 In an attempt to discover additional huntingtin phospho-sites, in a manner that may imply  
154 functional consequences, we conducted plate format screens of a panel of protein kinases (245  
155 Serine/Threonine; 94 Tyrosine) (Reactive Biology). Independent screens utilized either FLAG-  
156 tagged Q23-huntingtin or Q78-huntingtin purified from Sf9 Baculovirus system (see the detail in  
157 Methods) as substrates. We sought kinases that incorporated  $^{33}\text{P}$ i (from gamma- $^{33}\text{P}$ -ATP) above  
158 levels observed in replica plates without purified huntingtin ( $^{33}\text{P}$ i-incorporation ratio). Amongst

159 73 kinases, with a cut-off  $^{33}\text{Pi}$ -incorporation ratio  $>5$ , (S. Table 5), a few potentially preferentially  
160 phosphorylated either Q23-huntingtin, including G-protein-coupled receptor kinase 6 (GRK6),  
161 and MAP/microtubule-affinity regulating kinase 3 (MARK3), or Q78-huntingtin, including G-  
162 protein-coupled receptor kinase 3 (GRK3), casein kinase 1 isoform epsilon (CK1-epsilon), and  
163 dual-specificity tyrosine-regulated kinase 2 (DYRK2) (Figure 3). However, the vast majority  
164 exhibited similar activity on both substrates. Serum glucocorticoid regulated kinase 2 (SGK2) and  
165 MAP/microtubule-affinity regulating kinase 2 (MARK2), with  $^{33}\text{Pi}$ -incorporation ratios  $>40$ , were  
166 both notable but cAMP-dependent protein kinase A (PKA) stood apart because it exhibited four-  
167 fold higher activity than these on both substrates ( $^{33}\text{Pi}$ -incorporation ratio  $>180$ ) (Figure 3).

168

### 169 **The PKA catalytic subunit phosphorylated huntingtin at serine 2550**

170 To pursue this striking observation, we first demonstrated PKA catalytic subunit (PRKACA)-  
171 mediated incorporation of  $^{32}\text{Pi}$  (from gamma- $^{32}\text{P}$ -ATP) into Q23-huntingtin (S. Figure 4A), and  
172 then utilized LC-MS/MS analysis of purified Q23-huntingtin incubated with or without PKA  
173 catalytic subunit PRKACA, to identify potential PKA target sites. PRKACA increased the  
174 detection of two of the four highly reliable phosphopeptides (Ascore  $>19$ ; counts  $>2$ ); N-HEAT  
175 Ser1201 and C-HEAT Ser2550 (Figure 4A), though the former phosphopeptide was also detected  
176 in the absence of PRKACA. Since the Ser2550 phosphopeptide was detected only in the presence  
177 of the PKA catalytic subunit (Figure 4A) and also is flanked by a canonical PKA motif (RKLS),  
178 conserved in huntingtins of other vertebrates (Figure 4B), we focused subsequent analysis on this  
179 C-HEAT site.

180 PRKACA phosphorylation of Ser2550 in the context of Ser2550-peptide (S. Figure 4B) and  
181 purified Q23-huntingtin and Q78-huntingtin (S. Figure 4C) was confirmed by anti-pS2550



182 immunoblot analyses. Moreover, when PRKACA was co-transfected into *HTT*-null HEK293T  
183 cells with exogenous Q23-huntingtin, immunoblot analysis with pS2550 antibody (24 hours post  
184 transfection) detected a robust band of Q23-huntingtin-pSer2550 (Figure 4C), while anti-  
185 huntingtin reagents detected Q23-huntingtin, though by 48 hours the band intensity was decreased  
186 (S.Figure 4D). Indeed, detection of pSer2550-endogenous huntingtin, which confirmed that this  
187 C-HEAT site is phosphorylated by PKA, was difficult by anti-pS2550 immunoblot analysis (data  
188 not shown) and required both exogenous PRKACA expression in HEK293T cells and a sensitive  
189 huntingtin Ser2550 residue parallel-reaction monitoring (PRM) assay performed with pSer2550-  
190 immuno-enriched protein (Figure 4D).

191

## 192 **PRKACA phosphorylation of Ser2550 hastened huntingtin degradation**

193 The evidence for PKA mediated Ser2550 phosphorylation seemed at odds with the apparent  
194 inability to detect pSer2550 in the absence of PRKACA co-expression, in either exogenously  
195 expressed huntingtin (Figure 4C) or in endogenous huntingtin (Figure 2, S.Table 4, Figure 4D). A  
196 possible resolution to this apparent conundrum, implied by the decrease in Q23-huntingtin levels  
197 by 48 hours post PRKACA transfection (S.Figure 4D), was that phosphorylation of Ser2550 by  
198 this kinase may influence huntingtin turnover by altering the rate at which the protein is degraded.  
199 Assessing this presumption, we first confirmed by anti-huntingtin immunoblot analysis that  
200 Ser2550 was required for PRKACA co-expression to decrease Q23-huntingtin level, which  
201 revealed that this effect was not observed with 2550-alanine mutated Q23-huntingtin-2550A  
202 (Figure 5A). Then immunoblot monitoring of Q23-huntingtin and Q78-huntingtin levels in *HTT*-  
203 null HEK293T cells, after timed treatment with the protein translational-blocker cycloheximide,  
204 starting 24 hours post-transfection (P0), clearly demonstrated that PRKACA co-expression

205 hastened the rate of degradation of Q23-huntingtin and Q78-huntingtin. Levels of Q23-huntingtin  
206 (Figure 5B) and Q78-huntingtin (Figure 5C) decreased rapidly in cells expressing exogenous  
207 PRKACA, with a drop in normalized band-intensity evident at 2 hours post-cycloheximide and  
208 declining further over the next six hours at a rate estimated to be 0.07 units/hour and 0.1 units/hour,  
209 respectively, compared to 0.02 units per hour and 0.05 units per hour (respectively) for the same  
210 time-interval in control (empty-vector) transfected cells. Therefore, blocking the synthesis of new  
211 protein revealed that Ser2550 phosphorylation by exogenous PRKACA dramatically increased  
212 (three to four fold) the rate of Q23-huntingtin and Q78-huntingtin degradation, which seems likely  
213 to explain the impact of PRKACA in decreasing huntingtin levels over time in the absence of  
214 cycloheximide (S.Figure 4D and Figure 5A).

215

#### 216 **Reciprocal relationship between level of PRKACA and level of huntingtin**

217 Consequently, because our interest is in modulators of endogenous huntingtin, we investigated  
218 whether, as implied by the results above, exogenously expressed PRKACA would decrease  
219 endogenous huntingtin protein and, exploring a potential relationship, we also assessed whether  
220 reducing expression of endogenous PRKACA (using specific shRNA) would impact huntingtin  
221 level. As shown in Figure 6, immunoblot analysis revealed that HEK293T cells with exogenous-  
222 PRKACA exhibited lower levels of endogenous huntingtin (48 hours posttransfection), than  
223 untreated HEK293T cells (Figure 6A), whereas HEK293T cells stably expressing PRKACA-  
224 specific-shRNA expression vector, but not HEK293T cells with the scramble-shRNA vector, was  
225 associated with increased huntingtin band intensity, thereby implying an increase in huntingtin  
226 level (Figure 6B).

227 To investigate whether these findings may be relevant to HD cells, we first determined whether  
228 PKA-activation would impact endogenous huntingtins with normal- and HD mutant expanded-  
229 length polyglutamine tracts, in a member of our HD NPC series (hNPC.10). Immunoblot analysis  
230 demonstrated that enhancing PKA activity by treatment of hNPC.10 cells with PKA activator 8-  
231 Bromoadenosine 3',5'-cyclic adenosine monophosphate (8-Br-cAMP), which over time increased  
232 phosphorylation of PKA target protein CREB (24 hours), was rapidly (by 4 hours) associated with  
233 decreasing levels of both huntingtin and mutant huntingtin, expressed from the *HTT* normal (CAG  
234 18) and expanded (CAG 60) alleles, respectively (Figure 6C).

235 The results of acute (genetic- and compound-mediated) manipulation of PKA activity predicted a  
236 (inverse) relationship between the physiological levels of PRKACA and (total) huntingtin, which  
237 vary across the 11 members of our NPC panel. We therefore utilized isobaric mass tag-based  
238 quantitative proteome analysis to determine the abundance levels of PRKACA and the levels of  
239 (total) huntingtin expressed from both alleles (*HTT* CAG repeats ranging from 17 to 72 units). The  
240 PRKACA abundance level was not significantly related to *HTT* CAG repeat size (Multiple R-  
241 squared: 0.2013 and p-value: 0.1663). However, as shown in the plot in Figure 7, the PRKACA  
242 abundance exhibited an inverse relationship with (total) huntingtin protein level (Multiple R-  
243 squared: 0.443 and p-value: 0.02539), such that as PRKACA increased, huntingtin was decreased.

244

## 245 **DISCUSSION**

246 Genetic modifier studies point to the rate of (further) expansion of the pure CAG repeat in target  
247 cells as the driver of the timing of HD onset (Genetic Modifiers of Huntington's Disease, 2015;  
248 Genetic Modifiers of Huntington's Disease Consortium. Electronic address & Genetic Modifiers  
249 of Huntington's Disease, 2019). The subsequent event that initiates toxicity in target cells may

250 involve (further) polyglutamine-expanded huntingtin or an *HTT* exon1 polyglutamine-containing  
251 product (Michalik & Van Broeckhoven, 2003; Tabrizi, Flower, Ross, & Wild, 2020). The latter  
252 has been studied extensively, including predicted phospho-sites and kinases that can influence  
253 fragment aggregation, degradation or toxicity (Aiken et al., 2009; Gu et al., 2009; Hegde et al.,  
254 2020; Thompson et al., 2009). We, and others, are delineating phospho-sites that may be critical  
255 to the function and life-cycle of endogenous (full-length) huntingtin (Huang et al., 2015; T. Jung  
256 et al., 2020; Ratovitski et al., 2017; Schilling et al., 2006). Inclusion of MS-based  
257 phosphoproteomics analyses presented here, which confirmed 31 reported sites and added 14 new  
258 sites, a total of 95 phospho-sites have now been identified, 67 of which can be detected with  
259 endogenous protein. In conjunction with the cryoEM structure of huntingtin (Guo et al., 2018),  
260 this compendium provides insights into the clustered distribution of phospho-sites across the  
261 protein's HEAT domains. Moreover, comparison across the various huntingtin-substrates (full-  
262 length/fragment; purified/endogenous) highlights several phospho-site categories with which to  
263 prioritize specific sites for functional study, in addition to pSer2550 which we have demonstrated  
264 to be involved in huntingtin turnover (i.e. modulating the balance between degradation and renewal  
265 synthesis).

266 The major category, perhaps important for 'generic' huntingtin function, comprises sites that can  
267 be phosphorylated in many cell-types/tissues. Such sites are detected with purified huntingtin and  
268 are also frequently identified in (largely cancer-oriented) phospho-proteomic studies (>12 studies).  
269 These include two phospho-site clusters in different structurally unresolved regions within the N-  
270 HEAT domain: (pSer419, pSer421, pSer434, and pSer1181, pSer1201) and a cluster in an  
271 unresolved region of the Bridge domain (pSer1864, pSer1872 and pSer1876). Indeed, because they  
272 can be detected in fragment, many of the N-HEAT sites are well-studied. Ser421 phosphorylation

273 by AKT, and dephosphorylation by calcinurin, recruits and releases kinesin, respectively, thereby  
274 determining the direction of vesicle transport (e.g. BDNF) (Colin et al., 2008; Scaramuzzino, Cuoc,  
275 Pla, Humbert, & Saudou, 2022), while phosphorylation of this site is also reported to decrease  
276 huntingtin-cleavage and fragment-toxicity (Warby et al., 2005) and to influence mitochondrial  
277 phenotypes and toxicity in HD neuronal cells (Xu et al., 2020). CDK5 phosphorylation of pSer434  
278 was associated with decreased caspase cleavage of huntingtin (Luo, Vacher, Davies, &  
279 Rubinsztein, 2005), whereas CDK5 phosphorylation of pSer1181 and pSer1201 was reported to  
280 mediate huntingtin toxicity in neuronal cultures (Anne, Saudou, & Humbert, 2007). The cluster  
281 of Bridge sites is less well studied but in the context of highly purified protein, phosphorylation  
282 pSer1864 and pSer1876 varied with polyglutamine length, in a coordinated manner with other  
283 sites, which uncovered a subtle impact of polyglutamine size on accessibility of Bridge domain  
284 phospho-sites and cross-talk with N-HEAT phospho-sites (T. Jung et al., 2020).

285 A second category, perhaps connoting a role in cell-type or cell-state specific huntingtin function,  
286 comprises sites identified in endogenous huntingtin in several phospho-proteomic studies but not  
287 detected in multiple studies with purified human huntingtin protein (full-length and fragment).  
288 pSer622 in the N-HEAT domain (unresolved region) and pSer2936, located in the C-HEAT  
289 (structured region) domain were both identified in a study of mitotic regulators, aurora and polo-  
290 like kinases (Kettenbach et al., 2011), while the latter was also detected in studies of stress kinase  
291 pathways (ischemic tumors) (Mertins et al., 2014), and JAK3 inhibitors and MEK/BCL2 inhibitors  
292 (T-cell acute lymphoblastic leukemia) (Degryse et al., 2018), with an Huntington's Disease  
293 signaling module. These sites merit focused study, as huntingtin is reported to function in oxidative  
294 stress (Godin, Poizat, Hickey, Maschat, & Humbert, 2010; Machiela et al., 2020; Molina-Calavita  
295 et al., 2014).

296 A third category, of interest for huntingtin-lowering, comprises sites with potential function in  
297 huntingtin turnover; phospho-sites identified with highly purified huntingtin protein but not  
298 detected in endogenous huntingtin in any of the many mass spectrometry studies. Two C-HEAT  
299 domain sites, pSer2550 (structured region, Figure 1A) and pSer2076 (unresolved region), meet  
300 these criteria. The former site, as we discovered from the results of unbiased kinase screens with  
301 purified huntingtins, is a target of serine/threonine kinase PKA. PKA-mediated Ser2550  
302 phosphorylation is involved in huntingtin turnover, as discussed below. However, pSer2076 has  
303 not been investigated in this light, though it has been reported of high interest for HD, and is also  
304 deserving of focused study, because it is polymorphic in the population due to a single nucleotide  
305 DNA polymorphism (~0.1% minor allele frequency in HAPMAP) that changes the serine to a  
306 proline residue (Martin et al., 2018).

307 The discovery that PKA-mediated Ser2550 phosphorylation, by dramatically hastening the rate of  
308 huntingtin degradation, can influence huntingtin turnover and the steady state level of both normal-  
309 and expanded-polyglutamine huntingtin in growing cells is significant for several reasons. First, it  
310 hints at a dynamic (function-related) life-cycle, that is belied by the long steady-state half-life of  
311 the endogenous protein (Persichetti et al., 1996). In HD fibroblasts, the half-life of human  
312 huntingtin with normal- and expanded- range polyglutamine tracts was estimated to be ~48 and  
313 ~27 hours, respectively, with an half-life of total huntingtin protein of about 57 hours (Wu et al.,  
314 2016). Secondly, and supported by the finding that physiological variation in PRKACA level may  
315 be a meaningful determinant of huntingtin level, this discovery provides a specific kinase and  
316 phospho-site pair with which to delineate the molecular and cellular events that regulate and  
317 participate in huntingtin degradation and experiments to determine whether these are the same or

- 318 different in non-dividing cells, particularly neuronal cells that are the vulnerable targets of the HD
- 319 CAG repeat expansion mutation.

## 320 MATERIALS AND METHODS

### 321 Human huntingtin amino acid numbering

322 The polyglutamine tract in human huntingtin is polymorphic so that different reference amino acid  
323 sequences have different numbering. The cryo-EM huntingtin:HAP40 (Guo et al., 2018) was  
324 performed and numbered for a 17-polyglutamine tract; the PhosphoPlus site (Hornbeck et al., 2015)  
325 uses 21-polyglutamine tract. Here all human huntingtin amino acid numbering throughout is  
326 relative to NP 002102.4 reference sequence, with a 23-polyglutamine tract (T. Jung et al., 2020;  
327 Vijayvargia et al., 2016).

328

### 329 Human FLAG-huntingtin cDNA clones in pFASTBAC1

330 The information about full-length *HTT* cDNA cloned into pFASTBAC1 vector (Invitrogen) was  
331 mentioned in the previous paper (Vijayvargia et al., 2016). Using them, *HTT* cDNA for N-1192  
332 (amino acid 1-1192), N-589 fragments (amino acid 1-589) and C1213-3144 (amino acid 1213-  
333 3144) fragments were cloned into pFASTBAC1 as below: To make both large and small N-  
334 terminal fragments, the NcoI-XhoI *HTT* cDNAs with varying polyglutamine tracts (Q23, 46, 78)  
335 in pFASTBAC1 were used (Vijayvargia et al., 2016). The 3 kb PCR product generated with two  
336 primers, forward: 5'-TTACAGCTCGAG(XhoI)CTCTATAAGG-3' and reverse: 5'-  
337 ATATCCGCGG(SacII)TTATGGTTCTTTCTCCTTCCC-3' was inserted in frame using XhoI-  
338 SacII into the vector containing NcoI-XhoI *HTT* cDNA to make N-1192 fragment of huntingtin.  
339 The XhoI-KpnI *HTT* cDNA fragment, encoding huntingtin amino acid 170-589, was inserted into  
340 the same vector to generate N-589 fragment of huntingtin. C1213-3144 fragment in pFASTBAC1  
341 was made through two steps, 1) 2.5 kb PCR product was generated with two primers, forward: 5'-  
342 ATGCCTCGAG(XhoI)AGACAATCTGATACC-3' and reverse: 5'-



343 ATGCCGCGG(SacII)AGCAAGGATGTCGAC(SalI)CAT-3' and inserted into pFASTBAC1  
344 using XhoI and SacII. 2) the 3,528 bp SalI-SacII *HTT* cDNA fragment from a full *HTT* cDNA,  
345 pBS-HD1-3144Q23 (Seong et al., 2010) encoding huntingtin amino acid 2010-3144, was inserted  
346 in frame using SalI-SacII into the pFASTBAC1 containing the 2.5 kb PCR product above. All  
347 final clones were verified using full DNA sequence analysis. By convention, the amino acid  
348 numbering throughout the text follows the numbering of Q23-huntingtin (NP\_002102.4)  
349 regardless of the length of the polyglutamine tract.

350

### 351 **Mass spectrometry identification of phosphorylation sites**

352 For the determination of phosphorylation sites, recombinant N-1192 and N-589 fragments with  
353 polyglutamine tract length of 23, 46 and 78 and C1213-3144 fragment were purified in the  
354 presence of complete protease and phosphatase inhibitor cocktails (Roche Applied Science) to  
355 retain phosphorylation as described previously for recombinant full-length human huntingtin  
356 proteins (Vijayvargia et al., 2016). 10-20 µg of purified proteins were separated by SDS-PAGE  
357 and stained with mass spectrometry compatible Imperial protein stain (Thermo Fisher Scientific).  
358 For the identification of phosphorylation site(s) by PKA, purified Q23-huntingtin (5 µg) was  
359 purified in the presence of complete protease and phosphatase inhibitor cocktails (Roche Applied  
360 Science) and incubated with or without PRKACA (20 ng). Huntingtin bands (fragments or full-  
361 length) of all samples above were excised from gel and processed for mass spectrometry. Excised  
362 gel bands were cut into approximately 1 mm<sup>3</sup> pieces. The samples were reduced with 1 mM DTT  
363 for 30 minutes at 60 °C and then alkylated with 5 mM iodoacetamide for 15 minutes in the dark at  
364 room temperature. Gel pieces were then subjected to a modified in-gel trypsin digestion procedure  
365 (Shevchenko, Wilm, Vorm, & Mann, 1996). LC-MS/MS analysis of the digests was carried out

366 on an LTQ-Orbitrap mass spectrometer (Thermo Finnigan). The eluted peptides were detected,  
367 isolated, and fragmented to produce a tandem mass spectrum of specific fragment ions for each  
368 peptide. Peptide sequences (and hence protein identity) were determined by matching protein or  
369 translated nucleotide databases with the acquired fragmentation pattern by the software program  
370 TurboSEQUEST v.27 (Thermo Finnigan) (Eng, McCormack, & Yates, 1994). The modification  
371 of 79.9663 mass units to serine, threonine, and tyrosine was included in the database searches to  
372 determine phosphopeptides. Each phosphopeptide that was determined by the Sequest program  
373 was also manually inspected to ensure confidence. Phosphopeptides obtained were manually  
374 aligned to the huntingtin sequence to generate the coverage map.

375

### 376 **Proteome and phosphoproteome profiling with HD neuronal progenitor cells**

377 A panel of twelve HD NPCs (hNPC.01 ~ 12), each in duplicates were generated from iPSCs  
378 following standardized STEMdiff<sup>TM</sup> neural induction media method (STEMCELL Technologies)  
379 except hNPC.02 (neuroal rosettes and FACS sorting (Madison et al., 2015; Sheridan et al., 2011))  
380 and hNPC.04 (Enstem A hNPC purchased from MilliporeSigma) as previously described  
381 (Consortium, 2020) and named from the parental iPSC: HD17m.1 (CAG 17/15; NINDS iPSC ID:  
382 ND38555), HD17m.8c1 (CAG 17/17), HD19m.4 (CAG 19/16), HD25m.1 (CAG 25/17), HD33i.8  
383 (CAG 33/18; NINDS iPSC ID: ND36997), HD42m.1 (CAG 42/20; NINDS iPSC ID: ND38548),  
384 HD45m.2 (CAG 45/15), HD50m.1 (CAG 50/38), HD56m.4 (CAG 56/19), HD60i.4 (CAG 60/18;  
385 NINDS iPSC ID: ND36998), HD72m.2 (CAG 72/15), HD180i.7 (CAG 200 ~240/18; NINDS  
386 iPSC ID: ND36999), respectively (Consortium, 2012). NPC cells were cultured on a poly-l-  
387 ornithine- and laminin-coated six-well plate (Falcon) at 37°C in neural expansion media  
388 (STEMCELL Technologies, 70% DMEM, 30% Hams F12, 1X B27 Supplement, 1% penicillin/

389 streptomycin, with 20 ng/ml fibroblast growth factor (FGF), 20 ng/ml epidermal growth factor  
390 (EGF), and 5 mg/ml heparin freshly added just before use) and washed with PBS and harvested  
391 for proteome and phosphoproteome profiling.

392 Proteome and phosphoproteome profiling of twelve hNPCs, were performed as previously  
393 described (Mertins et al., 2018). Briefly, cells were lysed, reduced, alkalated and digested with  
394 LysC/Trypsin. Digested peptides were labeled with tandem mass tag (TMT) 10-plex reagent.  
395 Three TMT 10-plex experiments were performed each containing 4 of the cell lines in duplicate  
396 along with a common reference that was created by pooling equal amounts of all 24 samples.  
397 Following successful labeling reactions were quenched and samples for each plex were mixed and  
398 desalted. Resulting sample for each plex was first enriched by phosphotyrosine containing  
399 peptides using P1000 anti-phosphotyrosine antibody (CST) and enriched fraction was analyzed by  
400 LC-MS/MS (Keshishian et al., 2021). Flow through of the enrichment was desalted and  
401 fractionated on a 3.5  $\mu$ m Agilent Zorbax 300 Extend-C18 column (4.6 mm ID x 250 mm length)  
402 into 24 fractions. Five percent of each fraction representing total proteome was analyzed by LC-  
403 MS/MS (S. Figure 1). Remaining 95% of each of the fraction was enriched by immobilized metal-  
404 affinity chromatography (IMAC) for the analyses of phosphoproteome by LC-MS/MS. (S. Table  
405 3). LC-MS/MS analysis of all the samples were performed on QE plus MS system (Thermo Fisher  
406 Scientific) as described previously (Mertins et al., 2018).

407

#### 408 **Quantitative proteome and phosphoproteome analysis of huntingtin in HD neuronal** 409 **progenitor cells**

410 All the MS data were searched using Spectrum Mill MS Proteomics Software (Broad Institute)  
411 against Uniprot Human database downloaded in October, 2014. Protein and phosphosite level

412 ratios of each sample channel to the common reference was used for further statistical analysis of  
413 proteome and phosphoproteome datasets, respectively. A total of 11,998 protein isoforms were  
414 found to be detected in all sample replicates. These proteins were used to compare the human NPC  
415 samples to one another. The protein relative abundance levels were quantile normalized between  
416 samples using the Bioconductor limma package (3.42.2). After normalization, proteins exhibiting  
417 little variation between samples were removed by filtering away those with a sample-sample  
418 variance of  $<0.2$ . This reduced the dataset from 11,998 to 2,694 proteins. Principal components  
419 were then calculated from this reduced dataset using R version 3.6.3 and the scatter plot (S. Figure  
420 2) was generated using ggplot2 (3.3.3). The relative abundance levels of huntingtin phosphopeptides  
421 (Figure 2) and peptides (S. Figure 3) were plotted graphically relative to the sequence of the full  
422 length huntingtin sequence. The relationship between the relative expression of PRKACA  
423 (Uniprot: P17612) and the relative expression of huntingtin (Uniprot: P42858) of tested cell lines  
424 was plotted using using R 3.6.3 and ggplot2 3.3.3.

425

#### 426 **Kinase panel activity screens with purified huntingtins**

427 A total of 245 Serine/Threonine kinases and 94 Tyrosine kinases were screened to identify kinases  
428 targeting purified huntingtins performed by the KinaseFinder Screening service (Reaction  
429 Biology). In brief, 5  $\mu\text{g}$  of purified Q23-huntingtin or Q78-huntingtin was incubated with kinases  
430 in 50  $\mu\text{l}$  of buffer containing 60 mM HEPES-NaOH, pH 7.5, 3 mM  $\text{MgCl}_2$ , 3 mM  $\text{MnCl}_2$ , 3  $\mu\text{M}$   
431 Na-orthovanadate, 1.2 mM DTT, 50  $\mu\text{g/ml}$  PEG20000, 1  $\mu\text{M}$  ATP/ $[\gamma\text{-}^{33}\text{P}]\text{-ATP}$  ( $8.24 \times 10^5$  cpm  
432 per well), protein kinase (1-400 ng/50 $\mu\text{l}$ ) in 96-well, V-shaped polypropylene microtiter plates at  
433 30°C for 1 h. The reaction was stopped with 20  $\mu\text{l}$  of 10% (v/v)  $\text{H}_3\text{PO}_4$ . Of note, we did not use  
434 huntingtin purified under conditions that dephosphorylated residue because globally

435 dephosphorylated huntingtin was rapidly insoluble (data not shown). Each sample was transferred  
436 into 96-well glass fiber filter plates (MilliporeSigma) which is pre-wetted with 150 mM H<sub>3</sub>PO<sub>4</sub>,  
437 followed by incubation at room temperature for 10 min. The plates were washed thrice with 250  
438 μl of 150 mM H<sub>3</sub>PO<sub>4</sub> and once with 20 μl of 100% ethanol, then dried at 40°C for 30 min. 50 μl  
439 of scintillator (CARL ROTH) was added to each well and incorporation of <sup>33</sup>Pi was measured by  
440 a microplate scintillation counter Microbeta (Perkin Elmer). In order to evaluate the results, the  
441 background value (C) of the protein was subtracted from raw activity values (A) of each kinase,  
442 followed by normalized by the autophosphorylation activity (B) of each kinase which had  
443 previously been determined in three independent experiments: Activity ratio of Q23-huntingtin or  
444 Q78-huntingtin = (A-C)/B

445

#### 446 ***In vitro* kinase assay with recombinant full-length huntingtin and peptides**

447 For radiation detection method, 10 ng of PRKACA (SignalChem) was incubated with 5 μg of  
448 huntingtin in a buffer containing 50 mM Tris-HCl pH 7.5, 10 mM MgCl<sub>2</sub>, 0.1 mM EDTA, 2 mM  
449 DTT, and 2 μCi ATP/[γ-<sup>32</sup>P]-ATP at 30°C for 1 h. The reaction was stopped by boiling at 95°C  
450 for 10 min. Phosphorylated huntingtin was analyzed by SDS-PAGE and visualized by  
451 autoradiography with a Typhoon FLA 7000 (GE healthcare).

452 For immunoblotting method, each 2, 4 μg of GST tagged huntingtin peptides containing S2550  
453 residue (<sup>2546</sup>GRKLSIIRG<sup>2554</sup>) or 5 μg of huntingtin protein was incubated with 1 ng of PRKACA  
454 in a buffer containing 50 mM Tris-HCl pH 7.5, 10 mM MgCl<sub>2</sub>, 0.1 mM EDTA, 2 mM DTT, and  
455 200 μM ATP at 30°C for 1 h. Phosphorylated huntingtin peptides or huntingtin are subjected to  
456 SDS-PAGE and analyzed by immunoblotting. GST-tagged huntingtin peptide containing S2550  
457 was cloned in pGEX4T1 vector and expressed in *E. coli* BL21 (DE3) cells expression system and

458 purified through glutathione agarose resin. Peptides were eluted from resin in a buffer containing  
459 50 mM Tris-HCl pH 7.5, 100 mM NaCl, 50 mM Glycerol, and 10 mM Glutathione reduced (GSH).

460

461 **Human recombinant full-length huntingtin and PRKACA cDNAs in a mammalian**  
462 **expression vector**

463 All recombinant human FLAG tagged huntingtin cDNAs of Q23-huntingtin, Q23-huntingtin  
464 carrying S2550A mutation, and Q78-huntingtin used in this study were cloned in a modified  
465 pcDNA3 vector. The original polyclonal region of pcDNA3 vector (Invitrogen) was swapped with  
466 the modified polyclonal region containing 1X FLAG, 6X histidine tag, TEV protease recognition  
467 site, and several restriction enzyme sites, HindIII, BamHI, XhoI, SacII, and ApaI. Human FLAG  
468 tagged Q23-huntingtin and Q78-huntingtin cDNAs from previously reported human huntingtin  
469 pALHDQ23 insect cell expression vector (Shin et al., 2018) was inserted into between BamHI and  
470 SacII. To generate Q23-huntingtin S2550A cDNA, site-directed mutagenesis was carried out using  
471 Quick Change site-directed mutagenesis kit (Agilent) with pcDNA3 FLAG Q23-huntingtin as  
472 template and mutagenesis primer, 5'-GGGAGGAAGCTGGCGATTATCAGAGGG-3' according  
473 to the protocol from the manufacture. The recombinant human PRKACA cDNA was obtained  
474 from Addgene (Plasmid #23495) and cloned into between BamHI and KpnI in pcDNA5 vector  
475 (Invitrogen). All final clones were verified using full DNA sequence analysis.

476

477 **Cell culture, transfection and treatments**

478 *HTT* null HEK 293T, which was previously generated by using CRSPR/Cas9 to remove the first  
479 exon and upstream promoter region of *HTT* (R. Jung et al., 2021) and parental HEK 293T cell

480 lines were maintained in Dulbecco's Modified Eagle's Medium (Invitrogen) supplemented with  
481 1% Penicillin-Streptomycin (Gibco) and 10% FBS (MilliporeSigma) at 37°C in a humidified 5%  
482 CO<sub>2</sub> atmosphere. HD60i.4 NPCs (CAG 60/18) were cultured in neural expansion media as  
483 described above.

484 All recombinant human huntingtin and PRKACA cDNA plasmids were transfected into HEK  
485 293T cells or *HTT* null HEK 293T cells with Lipofectamine 3000 (Invitrogen) following  
486 manufacturer's instructions. 30 μM of cycloheximide (MilliporeSigma) was treated to cells  
487 expressing huntingtin without or with PRKACA at post 24 hours transfection. 300 μM of 8-Br-  
488 cAMP (Santa Cruz Biotechnology) was treated to hNPCs for 0, 4, 8, 24 hours to trigger PKA  
489 activity.

490

#### 491 **Immunoblotting**

492 Each sample was loaded on NuPAGE™ 4-12% Bis-Tris Protein Gels (Invitrogen) and separately  
493 by applying 120 V for 120 min except Figure 6C where the gel ran at 120 V for 300 min to separate  
494 Q20-huntingtin and Q62-huntingtin. Proteins were transferred to PVDF or nitrocellulose  
495 membrane from gels on demand. The membrane was blocked in a Tris-buffered saline buffer  
496 containing 0.1% tween 20 (TBS-T) with 5% skim milk for 1 hour or 5% BSA (for phosphor  
497 antibodies) for overnight. Each primary antibody (see below) was diluted in blocking buffer  
498 according to the manufacturer's instructions and incubated with membrane at 4°C overnight. After  
499 washing membrane three times using TBS-T buffer, each secondary antibody was incubated with  
500 membrane in a TBS-T buffer at room temperature for 1 h, and then washed three times with TBS-  
501 T buffer. For signal detection, Western lightning ECL pro (PerkinElmer) was used to film  
502 development.

503 Primary antibodies used in this research are as follows: mouse monoclonal anti-huntingtin  
504 antibody MAB2166 (MilliporeSigma), MAB2168 (MilliporeSigma), 1F8 (White et al., 1997),  
505 rabbit polyclonal anti-phospho Serine 2550 antibody (abHtt-pS2550) (T. Jung et al., 2020), rabbit  
506 polyclonal anti-GAPDH antibody (Santa Cruz Biotechnology), mouse monoclonal anti- $\alpha$ -tubulin  
507 antibody (Cell Signaling Technology), mouse monoclonal anti-PRKACA antibody (Santa Cruz  
508 Biotechnology), mouse monoclonal anti-CREB antibody (Cell Signaling Technology), rabbit  
509 monoclonal anti-phospho CREB (S133) antibody (Cell Signaling Technology).

510

#### 511 **Parallel reaction monitoring (PRM) MS analysis to quantify S2550 phosphopeptide**

512 To enrich endogenous huntingtin in cells in the absence or presence of exogenous PRKACA  
513 expression (24 hour), cell were harvested and lysed in a lysis buffer containing 0.2% n-dodecyl- $\beta$ -  
514 D-maltoside, 5 mM Mg(OAc)<sub>2</sub>, 70 mM KOAc, 50 mM HEPES pH 7.5, and cOmplete™ protease  
515 inhibitor cocktail tablet (Roche Applied Science) on a rotor at 4°C for 30 minutes. The lysed cells  
516 were centrifuged for 15 minutes at 13000 rpm and then the supernatants were incubated mouse  
517 monoclonal anti-huntingtin antibody MAB2166 (MilliporeSigma) conjugated Protein G Agarose  
518 (Roche) at 4°C for 2 hours. The precipitants were washed with the lysis buffer thrice. The bound  
519 samples were boiled to elute from resin and used for immunoblotting and tandem mass  
520 spectrometric analysis. To quantify S2550 phosphopeptides, PRM analyses were performed on a  
521 Q-Exactive mass spectrometer equipped with an Easy nLC-1000 (Thermo Fisher Scientific) at  
522 Quantitative Proteomics Resource Core at University of Pennsylvania Medicine. The peptides  
523 samples were separated using a linear gradient of 2% - 35% solvent B (0.1% formic acid in  
524 acetonitrile) at a flow rate of 300 nL min<sup>-1</sup> over 40 minutes, followed by an increase to 90% B  
525 over 4 minutes and held at 90% B for 6 min before returning to initial conditions of 2% B. For



526 peptide ionization, 2000 V was applied and a 250 °C capillary temperature was used. All samples  
527 were analyzed using a multiplexed PRM method based on an unscheduled inclusion list containing  
528 the target precursor ions and heavy isotope-labeled peptides. The full scan event was collected  
529 using an m/z 380–1500 mass selection, an Orbitrap resolution of 70K (at m/z 200), a target  
530 automatic gain control (AGC) value of  $1 \times 10^6$ , and maximum injection time of 54 milliseconds.  
531 The PRM scan events used an Orbitrap resolution of 17,500, an AGC value of  $1 \times 10^6$ , and a  
532 maximum fill time of 64 milliseconds with an isolation width of 2 m/z. Fragmentation was  
533 performed with a normalized collision energy of 27 and MS/MS scans were acquired with a  
534 starting mass of m/z 140. 100 fmol of heavy isotope-labeled peptides (KLSIIR\*) was spiked into  
535 each sample. PRM data analysis was performed using Skyline software (MacLean et al., 2010).

536

### 537 **Lentiviral transduction**

538 MISSION® shRNA PKA (shPKA, MilliporeSigma, SHCLNG-NM\_002730, TRCN0000367487)  
539 was used to knock down cellular PRKACA level. The sequences for PRKACA shRNA was 5'-  
540 CCGGGATAATCAGAGGGACAGAAACCTCGAGGTTTCTGTCCCTCTGATTATCTTTTT  
541 G-3'. Lentiviral particles encoding shPKA were transduced into HEK 293T cells at various range  
542 of a multiplicity of infection (MOI) in the presence of 8 µg/ml of polybrene to find optimal degree  
543 of PKA knock down. Cells were selected with puromycin by examining viability every 2 days for  
544 14 days to generate HEK 293T cells stably expressing shRKA RNA. To evaluate the reduced  
545 RNA expression level of PRKACA in selected stable cells, total RNA was prepared by RNeasy  
546 Plus kit (Qiagen) and cDNA synthesis was performed using SuperScript IV First-Strand Synthesis  
547 system (Thermo Scientific). PRKACA RNA expression level was measured by Quantitative real-  
548 time PCR (qRT-PCR) using LightCycler 480 SYBR Green I Master kit on Roche LightCycler 480

549 instrument. In order to detect protein expression level of PRKACA and huntingtin in selected  
550 stable cells, western blot was used as described above in methods.

551 **ACKNOWLEDGEMENTS**

552 We thank the members of the Song and Seong laboratories for suggestions and discussions. We  
553 are grateful to Dr. Ross Tomaino (The Taplin Mass Spectrometry Facility) for excellent technical  
554 support and also thank Hyungjoo Lee at Quantitative Proteomics Resource Core of School of  
555 Medicine at the University of Pennsylvania. This work was supported by a Global Research  
556 Laboratory grant [NRF-2016K1A1A2912057 to ISS and JS] and [NRF-2020R1A2B5B03001517  
557 to JS] from National Foundation of Korea and CHDI Foundation [MEM and ISS].

558

559 **AUTHOR CONTRIBUTIONS**

560 YL, DB, HK, KH, RV, RSA, HS, HK, JL designed and conducted experiments and performed  
561 data analysis. JS, ISS, SC, RL, SK, MEM contributed to the design of the study and YL, MEM,  
562 JS and ISS were involved in writing the manuscript, which was reviewed by all the authors.

563

564 **COMPETING FINANCIAL INTERESTS**

565 S.A.C. is a member of the scientific advisory boards of Kymera, PTM BioLabs, Seer and  
566 PrognomIQ. J.S. is a co-founder of PCG-Biotech, Ltd. The remaining authors declare no  
567 competing financial interests.

568 **FIGURE LEGENDS**

569 **Figure 1. Location of purified huntingtin phospho-sites relative to cryo-EM structure**

570 **domains. A.** The human huntingtin cryo-EM structure without HAP 40, generated with PyMOL  
571 v1.7.4.5 Edu Enhanced for Mac OS X using RSCB using PDB: 6EZ8 (Guo et al., 2018), shows  
572 the N-HEAT, Bridge and C-HEAT domains, colored in blue, yellow and red, respectively. The  
573 amino acid (a.a.) start (a.a. 97) and end (a.a. 3104) of the resolved structure and position of C-  
574 HEAT Ser2550 (S2550) (green) are indicated. **B.** The top schematic depicts full-length huntingtin  
575 with its polyglutamine tract (black bar), N-HEAT (blue), Bridge (yellow) and C-HEAT (red)  
576 domains and unresolved regions  $>20$  amino acids (grey bars) or  $\leq 20$  of amino acids (grey arrow  
577 heads) denoted. The amino acid numbering indicates the start (a.a.97) and end of resolved regions  
578 (a.a. 3104), the start of the Bridge (a.a.1691) and C-HEAT (a.a.2098) domains. The locations of  
579 phospho-sites we reported previously for purified Q23-huntingtin (T. Jung et al., 2020) are  
580 indicated under the schematic (black arrowheads). The schematic on the line below depicts the  
581 C1213-3144 fragment (a.a.1213-3144) and below that the schematics of the N1192 fragment  
582 (a.a.1-1192) (polyglutamine segments of 23, 46 and 78 residues) and the N589 fragment (a.a. 1-  
583 589) (23- and 46-polyglutamines), with phospho-sites identified in this study indicated (black  
584 arrow heads). Sites on a peptide that cannot be unambiguously identified (more than one potential  
585 residue) are marked by an asterisk.

586

587 **Figure 2. Location of phospho-sites NPC endogenous huntingtin across its domain structure.**

588 The schematic shows the residue location of the 26 phospho-sites identified in NPC, with those  
589 not previously reported indicated by bold text, along full-length huntingtin with its polyglutamine  
590 tract (black bar), N-HEAT (blue), Bridge (yellow) and C-HEAT (red) domains (unresolved regions

591 >20 amino acids = grey bars or  $\leq 20$  of amino acids = grey arrow heads beneath the schematic),  
592 numbering as in Figure 1B. Below that, aligned to the greyed huntingtin schematic, is a plot  
593 summarizing the locations and scaled relative abundance (compared to pooled reference control)  
594 of the phospho-serine (circles), phospho-threonine (triangles) and phospho-serine-threonine  
595 (squares) peptides identified for each NPC (hNPC.01 through hNPC.11) ranked (Y-axis) by  
596 decreasing size of the longer *HTT* CAG repeat allele, with the identified phospho-site peptide  
597 plotted on the X axis.

598

599 **Figure 3. PKA is top hit from Q23-huntingtin and Q78-huntingtin *in vitro* kinase screens.**

600 The plot compares kinase activity ratio for  $^{33}\text{P}$ i incorporation into Q23-huntingtin compared to  
601 Q78-huntingtin, for the 73 kinases showing activity ratio  $>5$  on both Q23- and Q78 huntingtin.  
602 The activity ratio was calculated by the equation,  $(A-C)/B$ , where  $A$  = Intensity raw value,  $B$  =  
603 Kinase autophosphorylation value and  $C$  = Substrate-background value for normalized mean of  
604 triplicates from mean of two individual experiments. A few kinases showed potential preference  
605 for Q23-huntingtin (e.g. GRK6, MARK3) or Q78-huntingtin (e.g. DYKR2, GRK3, CK1-epsilon)  
606 but most had similar activities on both substrates, including SGK2 and MARK2, with notable level  
607 of activity, though PKA was the top hit.

608

609 **Figure 4. PKA phosphorylates huntingtin at Ser2550. A.** Bar graph showing MS/MS results of

610 each phosphopeptide from Q23-huntingtin (HTT) incubated without (open bar) or with purified  
611 PRKACA (black bar). **B.** The multiple sequence alignment compares the human huntingtin amino  
612 acid sequence focused on the region of Ser2550 (Red bold) with huntingtins predicted from the  
613 gene sequence of other orthologs, *Macaca mulatta*, *Canis lupus familiaris*, *Mus musculus*, and

614 *Danio rerio*. Shading denotes the conservation of PKA substrate motif (RKXS) across these  
615 organisms. **C.** Immunoblot showing result of detecting pSer2550 in FLAG tagged huntingtin  
616 overexpressed without or with PRKACA overexpression in *HTT* null HEK 293T cells for 24 hours,  
617 with abHTT-pS2550, as well as huntingtin level detected with anti-huntingtin reagent (MAB2166),  
618 and PRKACA level detected with anti-PRKACA reagent, and  $\alpha$ -tubulin as loading control with  
619 anti-  $\alpha$ -tubulin reagent. **D.** Plot showing relative abundance of pSer2550 endogenous huntingtin  
620 peptide detected by PRM assay with or without overexpression of PRKACA for 24 hours in HEK  
621 293T cells. Endogenous huntingtin was enriched by immunoprecipitation with MAB2166  
622 antibody before PRM assay.

623

624 **Figure 5. PKA Ser2550 phosphorylation increases the rate of huntingtin degradation.** **A.** The  
625 immunoblot (left) shows the results of detecting Q23-huntingtin (HTT) or Q23-huntingtin  
626 phosphomutant S2550A overexpressed in *HTT* null HEK 293T cells in the absence or presence of  
627 PRKACA for 24 h or 48 h, with anti-huntingtin reagent (MAB2166) and PRKACA level detected  
628 with anti-PRKACA reagent, and  $\alpha$ -tubulin as loading control with anti-  $\alpha$ -tubulin reagent. The  
629 histogram (right) shows the huntingtin/ $\alpha$ -tubulin band intensities normalized to the mean ratio of  
630 each sample at post 24 hours transfection. Data represent mean  $\pm$  s.e.m (n = 2). **B and C.**  
631 immunoblots (left) showing cycloheximide (CHX) chase experiments of normal Q23-huntingtin  
632 (Q23 HTT) (**B**) and mutant Q78-huntingtin (Q78 HTT) (**C**) overexpressed without or with  
633 PRKACA overexpression in *HTT* null HEK 293T cells, probed with anti-huntingtin reagent  
634 (MAB2166), anti-PRKACA reagent and anti- $\alpha$ -tubulin reagent for huntingtin, PRKACA and  $\alpha$ -  
635 tubulin as loading control, respectively. For each, the plots (right) show the huntingtin/ $\alpha$ -tubulin  
636 band intensities normalized to the mean ratio of each sample at post 24 hours transfection (P0) in

637 the absence (open symbol) and presence (closed symbol) of PRKACA overexpression). Data  
638 represent mean  $\pm$  s.e.m (n = 2). Asterisks indicate level of statistical significance (paired Student's  
639 t-test, two tailed); \* P < 0.05.

640

641 **Figure 6. Cellular PKA activity is associated with endogenous huntingtin level. A.** The  
642 immunoblot (left) shows the expression levels of endogenous huntingtin (HTT) without or with  
643 overexpressed PRKACA in HEK293 cells, detected with anti-huntingtin reagent (MAB2166) and  
644 PRKACA levels detected with anti-PRKACA reagent and  $\alpha$ -tubulin as loading control with anti-  
645  $\alpha$ -tubulin reagent. The histogram (right) shows the huntingtin/ $\alpha$ -tubulin band intensities  
646 normalized to the mean ratio of each sample of empty vector for empty vector (open bar) and  
647 PRKACA (closed bar) expressed samples. Data represent mean  $\pm$  s.e.m (n = 3). **B.** The immunoblot  
648 (left) shows the expression level of endogenous huntingtin in HEK 293T cells stably expressing  
649 scramble- or PRKACA-shRNAs, detected with anti-huntingtin reagent (MAB2166) and PRKACA  
650 levels detected with anti-PRKACA reagent and  $\alpha$ -tubulin as loading control with anti-  $\alpha$ -tubulin  
651 reagent. The histogram (right) shows the huntingtin/ $\alpha$ -tubulin band intensities normalized to the  
652 mean ratio of each sample expressing scramble-shRNA for scramble-shRNA (open bar) and  
653 PRKACA-shRNA (closed bar) expressed samples. Data represent mean  $\pm$  s.e.m (n = 3). **C.** The  
654 immunoblot shows the expression level of endogenous huntingtin in hNPC (Q62/Q20) treated with  
655 DMSO or 300  $\mu$ M of 8-Br-cAMP, detected with anti-huntingtin reagent (MAB2166) and  
656 phosphor-CREB with anti-phosphor-CREB (S133) reagent, total CREB with anti-CREB reagent  
657 and  $\alpha$ -tubulin as loading control with anti-  $\alpha$ -tubulin reagent. Of note, Q62-huntingtin (red arrow)  
658 separated from Q20-huntingtin (black arrow) was also confirmed by probing with 1F8 antibody  
659 (data not shown (White et al., 1997)). A histogram showing total huntingtin/ $\alpha$ -tubulin band

660 intensities normalized to the mean ratio of each sample at 0 hours for DMSO (open symbol) and  
661 8-Br-cAMP (closed symbol) treated samples, respectively. Data represent mean  $\pm$  s.e.m (n = 2).  
662 Asterisks indicate level of statistical significance (paired Student's t-test, two tailed); \* P < 0.05.

663

664 **Figure 7. Inverse correlation between levels of huntingtin and PRKACA in a panel of HD**  
665 **neural progenitor cells.** The scatter plot of the endogenous huntingtin ratio (normalized to pooled  
666 reference sample) (X axis) versus endogenous PRKACA ratio (normalized to pooled reference  
667 sample) (Y axis) measured by quantitative LC-MS/MS using TMT 10-plex across each of the 11  
668 members of an hNPC panel shows an inverse correlation between huntingtin and PRKACA levels,  
669 as indicated by the linear regression line (black line), that is significant (Multiple R-squared: 0.443,  
670 Adjusted R-squared: 0.3812; F-statistic: 7.159 on 1 and 9 DF, p-value: 0.02539.)



671 **Supplementary Figure Legends**

672 **S. Figure 1. Workflow and experimental design of proteome and phosphoproteome of a panel**  
673 **of 12 HD hNPCs using TMT.** The top lines of the flow diagram show the sample pooling scheme;  
674 using TMT 10-plex reagents, duplicates of four hNPCs (hNPC.01 ~ hNPC.04) plus duplicates of  
675 pooled reference control that was mixed with each same portion lysates of all tested hNPC lysates  
676 were performed, along with two more sets (hNPC.05 ~ hNPC.08 and hNPC.09 ~ hNPC.012) that  
677 were subjected into the same proteomic and phosphoproteomic approaches. The bottom portion  
678 outlines steps for cell lysates with phosphotyrosine antibody enrichment, fractionation, metal  
679 affinity for phosphoprotein enrichment and quantitative MS analysis.

680

681 **S. Figure 2. Principal component protein abundance across the 12 sample hNPC dataset.**  
682 Principal components were calculated and plotted from protein abundance values after removing  
683 proteins exhibiting relatively invariant (variance < 0.2) abundance, revealed that hNPC.12 was an  
684 outlier compared to the other members of the panel.

685

686 **S. Figure 3. Location and relative abundance of huntingtin peptides identified in eleven**  
687 **hNPCs.** The location and relative abundance of the peptides identified from eleven hNPCs under  
688 a schematic of full length huntingtin, with its N-HEAT (blue), Bridge (yellow) and C-HEAT (red)  
689 domains, with structurally unresolved regions denoted in grey, for 11 members of the hNPC panel,  
690 ranked by size of longer CAG repeat allele (left column), with abundance of each peptide relative  
691 to the pooled reference control denoted by the heat-scale.

692

693 **S. Figure 4. Validation of huntingtin Ser2550 as target site by PKA. A.** An autoradiogram of  
694 SDS-PAGE showing a band of phosphorylated huntingtin (HTT) labelled with [ $\gamma$ - $^{32}$ P] ATP only  
695 in PRKACA **B.** The immunoblot shows a band of phosphorylated Ser2550-GST-tag-huntingtin  
696 peptide containing Ser2550 residue incubated with PRKACA but not in GST-tag only. Bottom  
697 panel shows the equal amounts of each peptide visualized with Coomassie Blue staining. **C.** An  
698 immunoblot showing bands of pSer2550-purified Q23-huntingtin and pSer2550Q78-huntingtin  
699 detected with abHTT-pS2550 antibody only after *in vitro* co-incubation with PRKACA (top), with  
700 bands of total huntingtin detected by MAB2166 (bottom). **D.** Immunoblots showing detection of  
701 bands of overexpressed huntingtin without or with PRKACA overexpression in *HTT* null HEK  
702 293T cells for 24 hours or 48 hours, detected with two anti-huntingtin reagents; MAB2166 epitope  
703 a.a. 181-810 of huntingtin (left), with PRKACA level detected with anti-PRKACA reagent and  $\alpha$ -  
704 tubulin as loading control with anti-  $\alpha$ -tubulin reagent.in the panel below, and MAB2168 epitope  
705 region: a.a. 2146-2541 (right). Note that no shorter products were detected by either reagent.

## 706 REFERENCES

- 707 Aiken, C. T., Steffan, J. S., Guerrero, C. M., Khashwji, H., Lukacsovich, T., Simmons, D., . . .  
708 Marsh, J. L. (2009). Phosphorylation of threonine 3: implications for Huntingtin  
709 aggregation and neurotoxicity. *J Biol Chem*, 284(43), 29427-29436.  
710 doi:10.1074/jbc.M109.013193
- 711 Andrade, M. A., & Bork, P. (1995). HEAT repeats in the Huntington's disease protein. *Nat Genet*,  
712 11(2), 115-116. doi:10.1038/ng1095-115
- 713 Anne, S. L., Saudou, F., & Humbert, S. (2007). Phosphorylation of huntingtin by cyclin-dependent  
714 kinase 5 is induced by DNA damage and regulates wild-type and mutant huntingtin toxicity  
715 in neurons. *J Neurosci*, 27(27), 7318-7328. doi:27/27/7318 [pii]  
716 10.1523/JNEUROSCI.1831-07.2007
- 717 Chiki, A., Ricci, J., Hegde, R., Abriata, L. A., Reif, A., Boudeffa, D., & Lashuel, H. A. (2021).  
718 Site-Specific Phosphorylation of Huntingtin Exon 1 Recombinant Proteins Enabled by the  
719 Discovery of Novel Kinases. *Chembiochem*, 22(1), 217-231. doi:10.1002/cbic.202000508
- 720 Colin, E., Zala, D., Liot, G., Rangone, H., Borrell-Pages, M., Li, X. J., . . . Humbert, S. (2008).  
721 Huntingtin phosphorylation acts as a molecular switch for anterograde/retrograde transport  
722 in neurons. *EMBO J*, 27(15), 2124-2134. doi:emboj2008133 [pii]  
723 10.1038/emboj.2008.133
- 724 Huntington's Disease iPSC Consortium, (2012). Induced pluripotent stem cells from patients with  
725 Huntington's disease show CAG-repeat-expansion-associated phenotypes. *Cell Stem Cell*,  
726 11(2), 264-278. doi:10.1016/j.stem.2012.04.027
- 727 Huntington's Disease iPSC Consortium, (2020). Bioenergetic deficits in Huntington's disease  
728 iPSC-derived neural cells and rescue with glycolytic metabolites. *Hum Mol Genet*, 29(11),  
729 1757-1771. doi:10.1093/hmg/ddy430
- 730 Degryse, S., de Bock, C. E., Demeyer, S., Govaerts, I., Bornschein, S., Verbeke, D., . . . Dun, M.  
731 D. (2018). Mutant JAK3 phosphoproteomic profiling predicts synergism between JAK3  
732 inhibitors and MEK/BCL2 inhibitors for the treatment of T-cell acute lymphoblastic  
733 leukemia. *Leukemia*, 32(3), 788-800. doi:10.1038/leu.2017.276
- 734 Eng, J. K., McCormack, A. L., & Yates, J. R. (1994). An approach to correlate tandem mass  
735 spectral data of peptides with amino acid sequences in a protein database. *J Am Soc Mass  
736 Spectrom*, 5(11), 976-989. doi:10.1016/1044-0305(94)80016-2
- 737 Genetic Modifiers of Huntington's Disease Consortium, (2015). Identification of Genetic Factors  
738 that Modify Clinical Onset of Huntington's Disease. *Cell*, 162(3), 516-526.  
739 doi:10.1016/j.cell.2015.07.003
- 740 Genetic Modifiers of Huntington's Disease Consortium, (2019). CAG Repeat Not Polyglutamine  
741 Length Determines Timing of Huntington's Disease Onset. *Cell*, 178(4), 887-900 e814.  
742 doi:10.1016/j.cell.2019.06.036
- 743 Godin, J. D., Poizat, G., Hickey, M. A., Maschat, F., & Humbert, S. (2010). Mutant huntingtin-  
744 impaired degradation of beta-catenin causes neurotoxicity in Huntington's disease. *EMBO  
745 J*, 29(14), 2433-2445. doi:10.1038/emboj.2010.117
- 746 Gu, X., Greiner, E. R., Mishra, R., Kodali, R., Osmand, A., Finkbeiner, S., . . . Yang, X. W. (2009).  
747 Serines 13 and 16 are critical determinants of full-length human mutant huntingtin induced  
748 disease pathogenesis in HD mice. *Neuron*, 64(6), 828-840. doi:S0896-6273(09)00936-2  
749 [pii]  
750 10.1016/j.neuron.2009.11.020

- 751 Guo, Q., Bin, H., Cheng, J., Seefelder, M., Engler, T., Pfeifer, G., . . . Kochanek, S. (2018). The  
752 cryo-electron microscopy structure of huntingtin. *Nature*, *555*(7694), 117-120.  
753 doi:10.1038/nature25502
- 754 Harding, R. J., Deme, J. C., Hevler, J. F., Tamara, S., Lemak, A., Cattle, J. P., . . . Arrowsmith, C.  
755 H. (2021). Huntingtin structure is orchestrated by HAP40 and shows a polyglutamine  
756 expansion-specific interaction with exon 1. *Commun Biol*, *4*(1), 1374. doi:10.1038/s42003-  
757 021-02895-4
- 758 Hegde, R. N., Chiki, A., Petricca, L., Martufi, P., Arbez, N., Mouchiroud, L., . . . Lashuel, H. A.  
759 (2020). TBK1 phosphorylates mutant Huntingtin and suppresses its aggregation and  
760 toxicity in Huntington's disease models. *EMBO J*, *39*(17), e104671.  
761 doi:10.15252/embj.2020104671
- 762 Hendricks, A. E., Latourelle, J. C., Lunetta, K. L., Cupples, L. A., Wheeler, V., MacDonald, M.  
763 E., . . . Myers, R. H. (2009). Estimating the probability of de novo HD cases from  
764 transmissions of expanded penetrant CAG alleles in the Huntington disease gene from male  
765 carriers of high normal alleles (27-35 CAG). *Am J Med Genet A*, *149A*(7), 1375-1381.  
766 doi:10.1002/ajmg.a.32901
- 767 Hong, E. P., MacDonald, M. E., Wheeler, V. C., Jones, L., Holmans, P., Orth, M., . . . Lee, J. M.  
768 (2021). Huntington's Disease Pathogenesis: Two Sequential Components. *J Huntingtons*  
769 *Dis*, *10*(1), 35-51. doi:10.3233/JHD-200427
- 770 Hornbeck, P. V., Zhang, B., Murray, B., Kornhauser, J. M., Latham, V., & Skrzypek, E. (2015).  
771 PhosphoSitePlus, 2014: mutations, PTMs and recalibrations. *Nucleic Acids Res*,  
772 *43*(Database issue), D512-520. doi:10.1093/nar/gku1267
- 773 Huang, B., Lucas, T., Kueppers, C., Dong, X., Krause, M., Bepperling, A., . . . Kochanek, S. (2015).  
774 Scalable production in human cells and biochemical characterization of full-length normal  
775 and mutant huntingtin. *PLoS One*, *10*(3), e0121055. doi:10.1371/journal.pone.0121055
- 776 Jiang, M., Zhang, X., Liu, H., LeBron, J., Alexandris, A., Peng, Q., . . . Duan, W. (2020). Nemo-  
777 like kinase reduces mutant huntingtin levels and mitigates Huntington's disease. *Hum Mol*  
778 *Genet*, *29*(8), 1340-1352. doi:10.1093/hmg/ddaa061
- 779 Jung, R., Lee, Y., Barker, D., Correia, K., Shin, B., Loupe, J., . . . Seong, I. S. (2021). Mutations  
780 causing Lopes-Maciel-Rodan syndrome are huntingtin hypomorphs. *Hum Mol Genet*,  
781 *30*(3-4), 135-148. doi:10.1093/hmg/ddaa283
- 782 Jung, T., Shin, B., Tamo, G., Kim, H., Vijayvargia, R., Leitner, A., . . . Song, J. J. (2020). The  
783 Polyglutamine Expansion at the N-Terminal of Huntingtin Protein Modulates the Dynamic  
784 Configuration and Phosphorylation of the C-Terminal HEAT Domain. *Structure*, *28*(9),  
785 1035-1050 e1038. doi:10.1016/j.str.2020.06.008
- 786 Keshishian, H., McDonald, E. R., 3rd, Mundt, F., Melanson, R., Krug, K., Porter, D. A., . . . Carr,  
787 S. A. (2021). A highly multiplexed quantitative phosphosite assay for biology and  
788 preclinical studies. *Mol Syst Biol*, *17*(9), e10156. doi:10.15252/msb.202010156
- 789 Kettenbach, A. N., Schweppe, D. K., Faherty, B. K., Pechenick, D., Pletnev, A. A., & Gerber, S.  
790 A. (2011). Quantitative phosphoproteomics identifies substrates and functional modules of  
791 Aurora and Polo-like kinase activities in mitotic cells. *Sci Signal*, *4*(179), rs5.  
792 doi:10.1126/scisignal.2001497
- 793 Kim, H., Hyun, K. G., Lloret, A., Seong, I. S., & Song, J. J. (2021). Purification of full-length  
794 recombinant human huntingtin proteins with allelic series of polyglutamine lengths. *STAR*  
795 *Protoc*, *2*(4), 100886. doi:10.1016/j.xpro.2021.100886

- 796 Kratter, I. H., Zahed, H., Lau, A., Tsvetkov, A. S., Daub, A. C., Weiberth, K. F., . . . Finkbeiner,  
797 S. (2016). Serine 421 regulates mutant huntingtin toxicity and clearance in mice. *J Clin*  
798 *Invest*, 126(9), 3585-3597. doi:10.1172/JCI80339
- 799 Lee, J. M., Ramos, E. M., Lee, J. H., Gillis, T., Mysore, J. S., Hayden, M. R., . . . HSG, C. s. o. t.  
800 (2012). CAG repeat expansion in Huntington disease determines age at onset in a fully  
801 dominant fashion. *Neurology*, 78(10), 690-695. doi:10.1212/WNL.0b013e318249f683
- 802 Lontay, B., Kiss, A., Virag, L., & Tar, K. (2020). How Do Post-Translational Modifications  
803 Influence the Pathomechanistic Landscape of Huntington's Disease? A Comprehensive  
804 Review. *Int J Mol Sci*, 21(12). doi:10.3390/ijms21124282
- 805 Luo, S., Vacher, C., Davies, J. E., & Rubinsztein, D. C. (2005). Cdk5 phosphorylation of  
806 huntingtin reduces its cleavage by caspases: implications for mutant huntingtin toxicity. *J*  
807 *Cell Biol*, 169(4), 647-656. doi:10.1083/jcb.200412071
- 808 Machiela, E., Jeloka, R., Caron, N. S., Mehta, S., Schmidt, M. E., Baddeley, H. J. E., . . . Southwell,  
809 A. L. (2020). The Interaction of Aging and Cellular Stress Contributes to Pathogenesis in  
810 Mouse and Human Huntington Disease Neurons. *Front Aging Neurosci*, 12, 524369.  
811 doi:10.3389/fnagi.2020.524369
- 812 MacLean, B., Tomazela, D. M., Shulman, N., Chambers, M., Finney, G. L., Frewen, B., . . .  
813 MacCoss, M. J. (2010). Skyline: an open source document editor for creating and analyzing  
814 targeted proteomics experiments. *Bioinformatics*, 26(7), 966-968.  
815 doi:10.1093/bioinformatics/btq054
- 816 Madison, J. M., Zhou, F., Nigam, A., Hussain, A., Barker, D. D., Nehme, R., . . . Haggarty, S. J.  
817 (2015). Characterization of bipolar disorder patient-specific induced pluripotent stem cells  
818 from a family reveals neurodevelopmental and mRNA expression abnormalities. *Mol*  
819 *Psychiatry*, 20(6), 703-717. doi:10.1038/mp.2015.7
- 820 Martin, D. D. O., Kay, C., Collins, J. A., Nguyen, Y. T., Slama, R. A., & Hayden, M. R. (2018).  
821 A human huntingtin SNP alters post-translational modification and pathogenic proteolysis  
822 of the protein causing Huntington disease. *Sci Rep*, 8(1), 8096. doi:10.1038/s41598-018-  
823 25903-w
- 824 Marxreiter, F., Stemick, J., & Kohl, Z. (2020). Huntingtin Lowering Strategies. *Int J Mol Sci*, 21(6).  
825 doi:10.3390/ijms21062146
- 826 McColgan, P., & Tabrizi, S. J. (2018). Huntington's disease: a clinical review. *Eur J Neurol*, 25(1),  
827 24-34. doi:10.1111/ene.13413
- 828 Mertins, P., Tang, L. C., Krug, K., Clark, D. J., Gritsenko, M. A., Chen, L., . . . Carr, S. A. (2018).  
829 Reproducible workflow for multiplexed deep-scale proteome and phosphoproteome  
830 analysis of tumor tissues by liquid chromatography-mass spectrometry. *Nat Protoc*, 13(7),  
831 1632-1661. doi:10.1038/s41596-018-0006-9
- 832 Mertins, P., Yang, F., Liu, T., Mani, D. R., Petyuk, V. A., Gillette, M. A., . . . Carr, S. A. (2014).  
833 Ischemia in tumors induces early and sustained phosphorylation changes in stress kinase  
834 pathways but does not affect global protein levels. *Mol Cell Proteomics*, 13(7), 1690-1704.  
835 doi:10.1074/mcp.M113.036392
- 836 Michalik, A., & Van Broeckhoven, C. (2003). Pathogenesis of polyglutamine disorders:  
837 aggregation revisited. *Hum Mol Genet*, 12 Spec No 2, R173-186. doi:10.1093/hmg/ddg295
- 838 Molina-Calavita, M., Barnat, M., Elias, S., Aparicio, E., Piel, M., & Humbert, S. (2014). Mutant  
839 huntingtin affects cortical progenitor cell division and development of the mouse neocortex.  
840 *J Neurosci*, 34(30), 10034-10040. doi:10.1523/JNEUROSCI.0715-14.2014

- 841 A novel gene containing a trinucleotide repeat that is expanded and unstable on Huntington's  
842 disease chromosomes. The Huntington's Disease Collaborative Research Group. (1993).  
843 *Cell*, 72(6), 971-983. doi:0092-8674(93)90585-E [pii]
- 844 Persichetti, F., Carlee, L., Faber, P. W., McNeil, S. M., Ambrose, C. M., Srinidhi, J., . . .  
845 MacDonald, M. E. (1996). Differential expression of normal and mutant Huntington's  
846 disease gene alleles. *Neurobiol Dis*, 3(3), 183-190. doi:10.1006/nbdi.1996.0018
- 847 Ratovitski, T., O'Meally, R. N., Jiang, M., Chaerkady, R., Chighladze, E., Stewart, J. C., . . . Ross,  
848 C. A. (2017). Post-Translational Modifications (PTMs), Identified on Endogenous  
849 Huntingtin, Cluster within Proteolytic Domains between HEAT Repeats. *J Proteome Res*,  
850 16(8), 2692-2708. doi:10.1021/acs.jproteome.6b00991
- 851 Sambataro, F., & Pennuto, M. (2017). Post-translational Modifications and Protein Quality  
852 Control in Motor Neuron and Polyglutamine Diseases. *Front Mol Neurosci*, 10, 82.  
853 doi:10.3389/fnmol.2017.00082
- 854 Sathasivam, K., Neueder, A., Gipson, T. A., Landles, C., Benjamin, A. C., Bondulich, M. K., . . .  
855 Bates, G. P. (2013). Aberrant splicing of HTT generates the pathogenic exon 1 protein in  
856 Huntington disease. *Proc Natl Acad Sci U S A*, 110(6), 2366-2370.  
857 doi:10.1073/pnas.1221891110
- 858 Scaramuzzino, C., Cuoc, E. C., Pla, P., Humbert, S., & Saudou, F. (2022). Calcineurin and  
859 huntingtin form a calcium-sensing machinery that directs neurotrophic signals to the  
860 nucleus. *Sci Adv*, 8(1), eabj8812. doi:10.1126/sciadv.abj8812
- 861 Schilling, B., Gafni, J., Torcassi, C., Cong, X., Row, R. H., LaFevre-Bernt, M. A., . . . Ellerby, L.  
862 M. (2006). Huntingtin phosphorylation sites mapped by mass spectrometry. Modulation of  
863 cleavage and toxicity. *J Biol Chem*, 281(33), 23686-23697. doi:M513507200 [pii]  
864 10.1074/jbc.M513507200
- 865 Seong, I. S., Woda, J. M., Song, J. J., Lloret, A., Abeyrathne, P. D., Woo, C. J., . . . MacDonald,  
866 M. E. (2010). Huntingtin facilitates polycomb repressive complex 2. *Hum Mol Genet*, 19(4),  
867 573-583. doi:10.1093/hmg/ddp524
- 868 Sheridan, S. D., Theriault, K. M., Reis, S. A., Zhou, F., Madison, J. M., Daheron, L., . . . Haggarty,  
869 S. J. (2011). Epigenetic characterization of the FMR1 gene and aberrant neurodevelopment  
870 in human induced pluripotent stem cell models of fragile X syndrome. *PLoS One*, 6(10),  
871 e26203. doi:10.1371/journal.pone.0026203
- 872 Shevchenko, A., Wilm, M., Vorm, O., & Mann, M. (1996). Mass spectrometric sequencing of  
873 proteins silver-stained polyacrylamide gels. *Anal Chem*, 68(5), 850-858.  
874 doi:10.1021/ac950914h
- 875 Shin, B., Jung, R., Oh, H., Owens, G. E., Lee, H., Kwak, S., . . . Seong, I. S. (2018). Novel DNA  
876 Aptamers that Bind to Mutant Huntingtin and Modify Its Activity. *Mol Ther Nucleic Acids*,  
877 11, 416-428. doi:10.1016/j.omtn.2018.03.008
- 878 Tabrizi, S. J., Flower, M. D., Ross, C. A., & Wild, E. J. (2020). Huntington disease: new insights  
879 into molecular pathogenesis and therapeutic opportunities. *Nat Rev Neurol*, 16(10), 529-  
880 546. doi:10.1038/s41582-020-0389-4
- 881 Tabrizi, S. J., Ghosh, R., & Leavitt, B. R. (2019). Huntingtin Lowering Strategies for Disease  
882 Modification in Huntington's Disease. *Neuron*, 101(5), 801-819.  
883 doi:10.1016/j.neuron.2019.01.039
- 884 Thompson, L. M., Aiken, C. T., Kaltenbach, L. S., Agrawal, N., Illes, K., Khoshnan, A., . . . Steffan,  
885 J. S. (2009). IKK phosphorylates Huntingtin and targets it for degradation by the  
886 proteasome and lysosome. *J Cell Biol*, 187(7), 1083-1099. doi:jcb.200909067 [pii]

887 10.1083/jcb.200909067

888 Vijayvargia, R., Epanand, R., Leitner, A., Jung, T. Y., Shin, B., Jung, R., . . . Seong, I. S. (2016).  
889 Huntingtin's spherical solenoid structure enables polyglutamine tract-dependent  
890 modulation of its structure and function. *Elife*, 5, e11184. doi:10.7554/eLife.11184

891 Warby, S. C., Chan, E. Y., Metzler, M., Gan, L., Singaraja, R. R., Crocker, S. F., . . . Hayden, M.  
892 R. (2005). Huntingtin phosphorylation on serine 421 is significantly reduced in the striatum  
893 and by polyglutamine expansion in vivo. *Hum Mol Genet*, 14(11), 1569-1577.  
894 doi:10.1093/hmg/ddi165

895 White, J. K., Auerbach, W., Duyao, M. P., Vonsattel, J. P., Gusella, J. F., Joyner, A. L., &  
896 MacDonald, M. E. (1997). Huntingtin is required for neurogenesis and is not impaired by  
897 the Huntington's disease CAG expansion. *Nat Genet*, 17(4), 404-410. doi:10.1038/ng1297-  
898 404

899 Wu, P., Lu, M. X., Cui, X. T., Yang, H. Q., Yu, S. L., Zhu, J. B., . . . Lu, B. (2016). A high-  
900 throughput-compatible assay to measure the degradation of endogenous Huntingtin  
901 proteins. *Acta Pharmacol Sin*, 37(10), 1307-1314. doi:10.1038/aps.2016.31

902 Xu, X., Ng, B., Sim, B., Radulescu, C. I., Yusof, N., Goh, W. I., . . . Pouladi, M. A. (2020). pS421  
903 huntingtin modulates mitochondrial phenotypes and confers neuroprotection in an HD  
904 hiPSC model. *Cell Death Dis*, 11(9), 809. doi:10.1038/s41419-020-02983-z

905

**Figure 1**

**A**

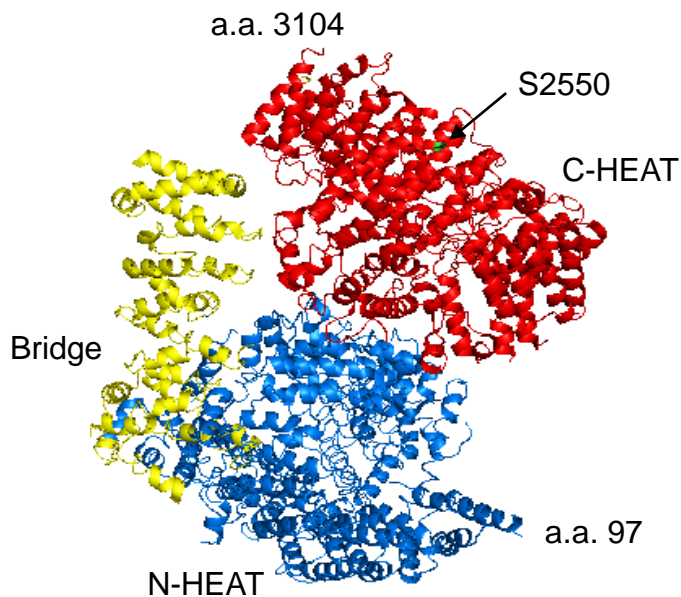

**B**

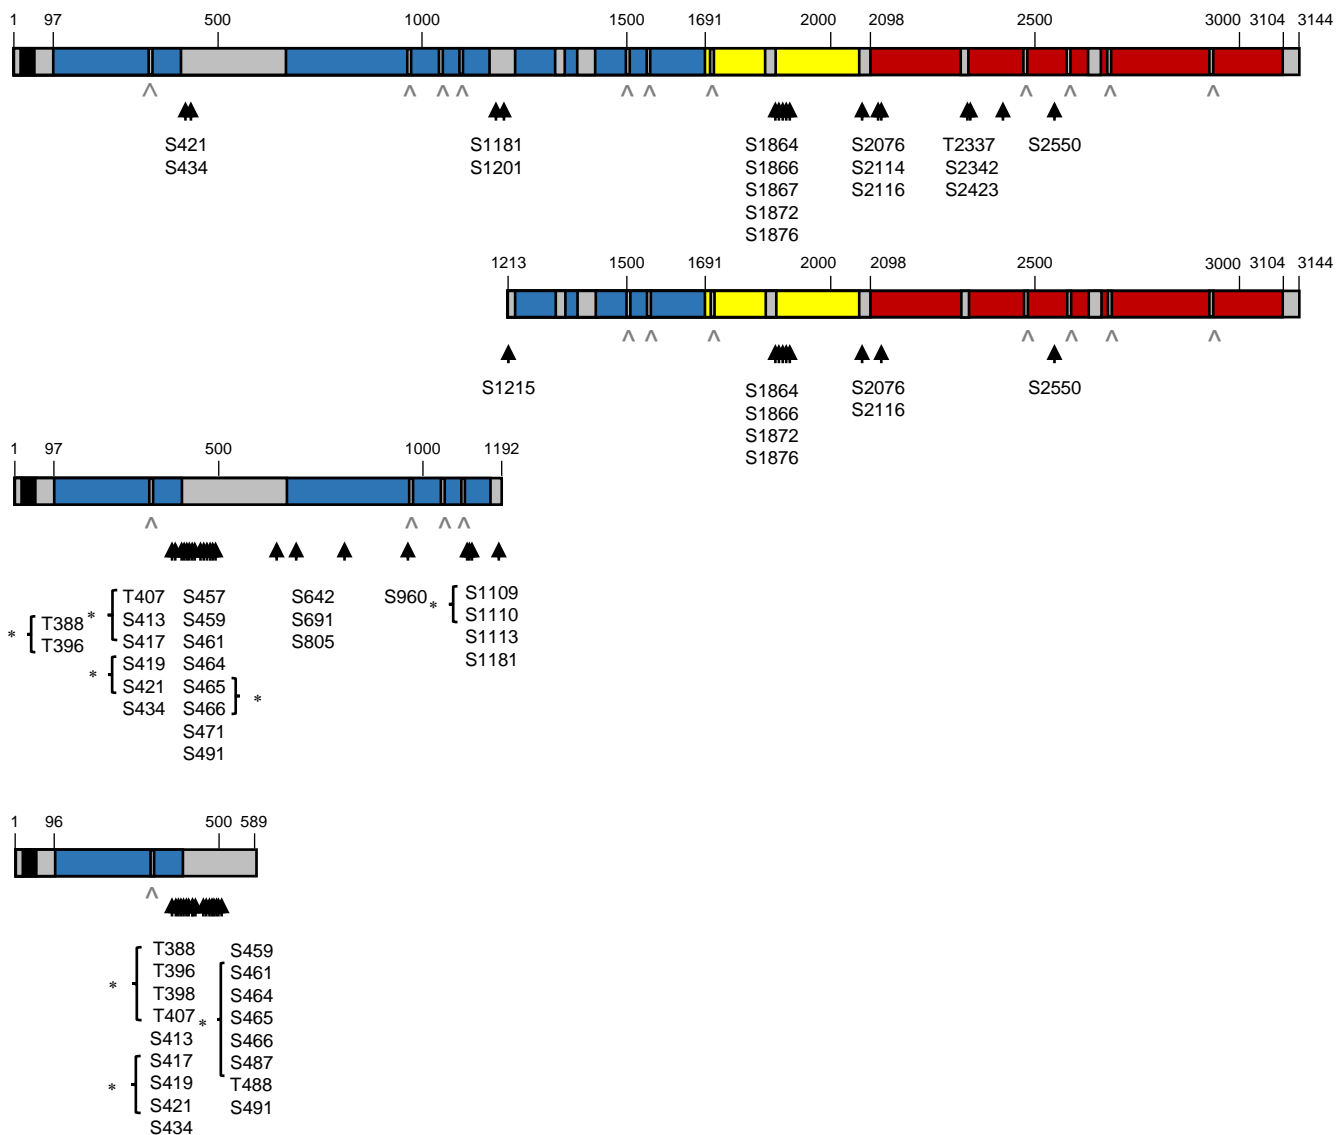



**Figure 2**

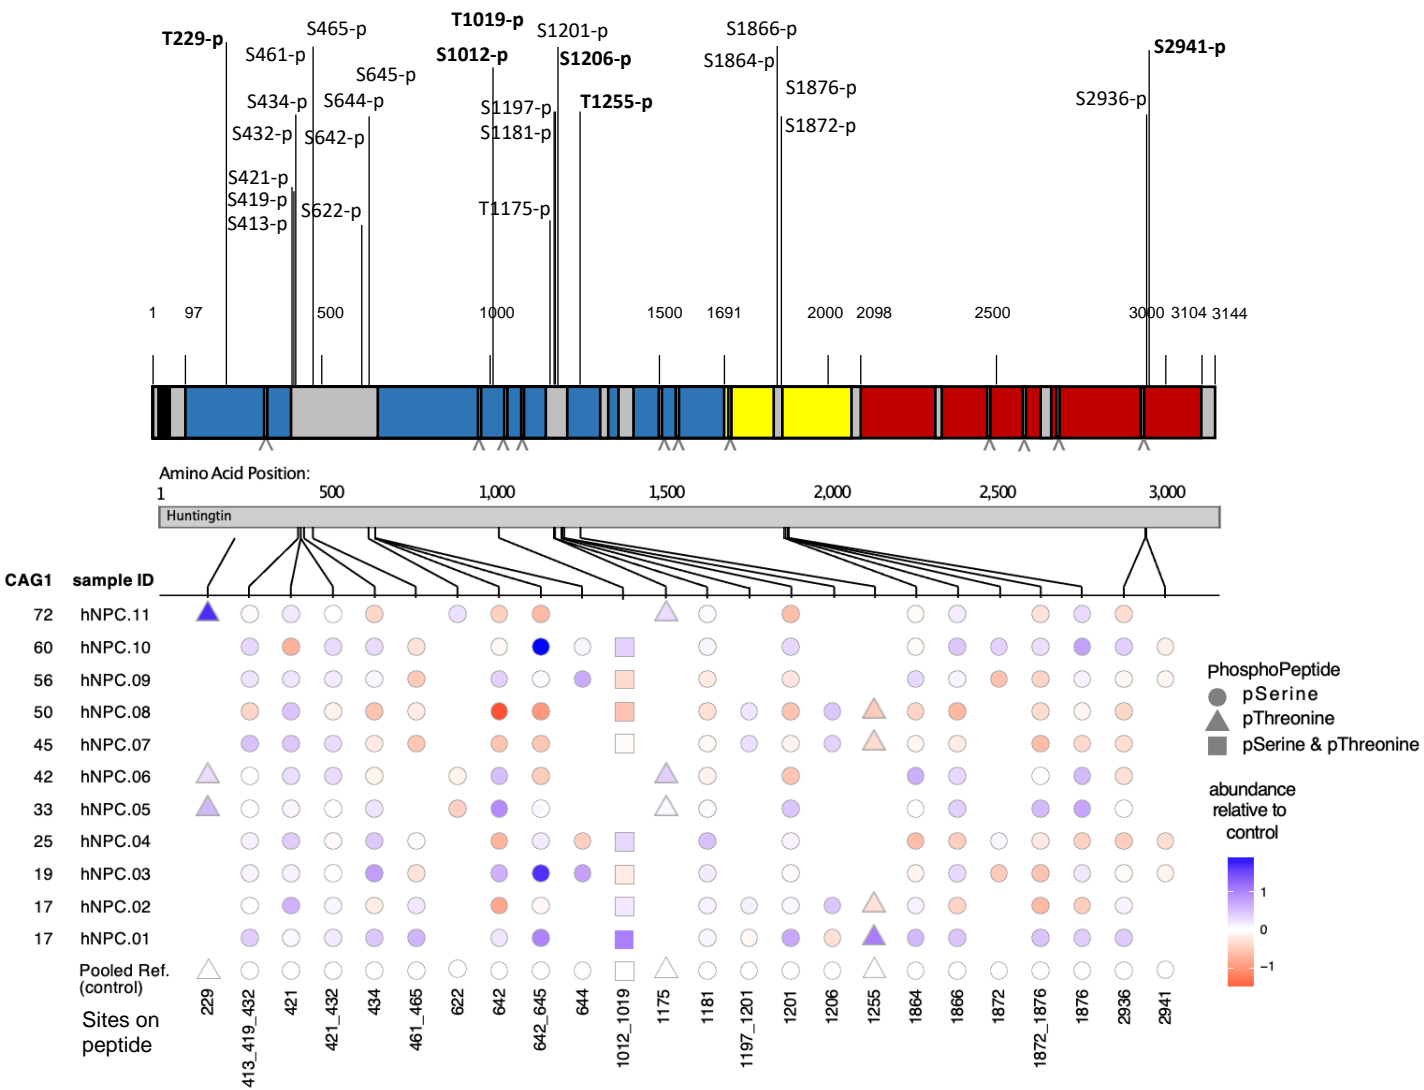

**Figure 3**

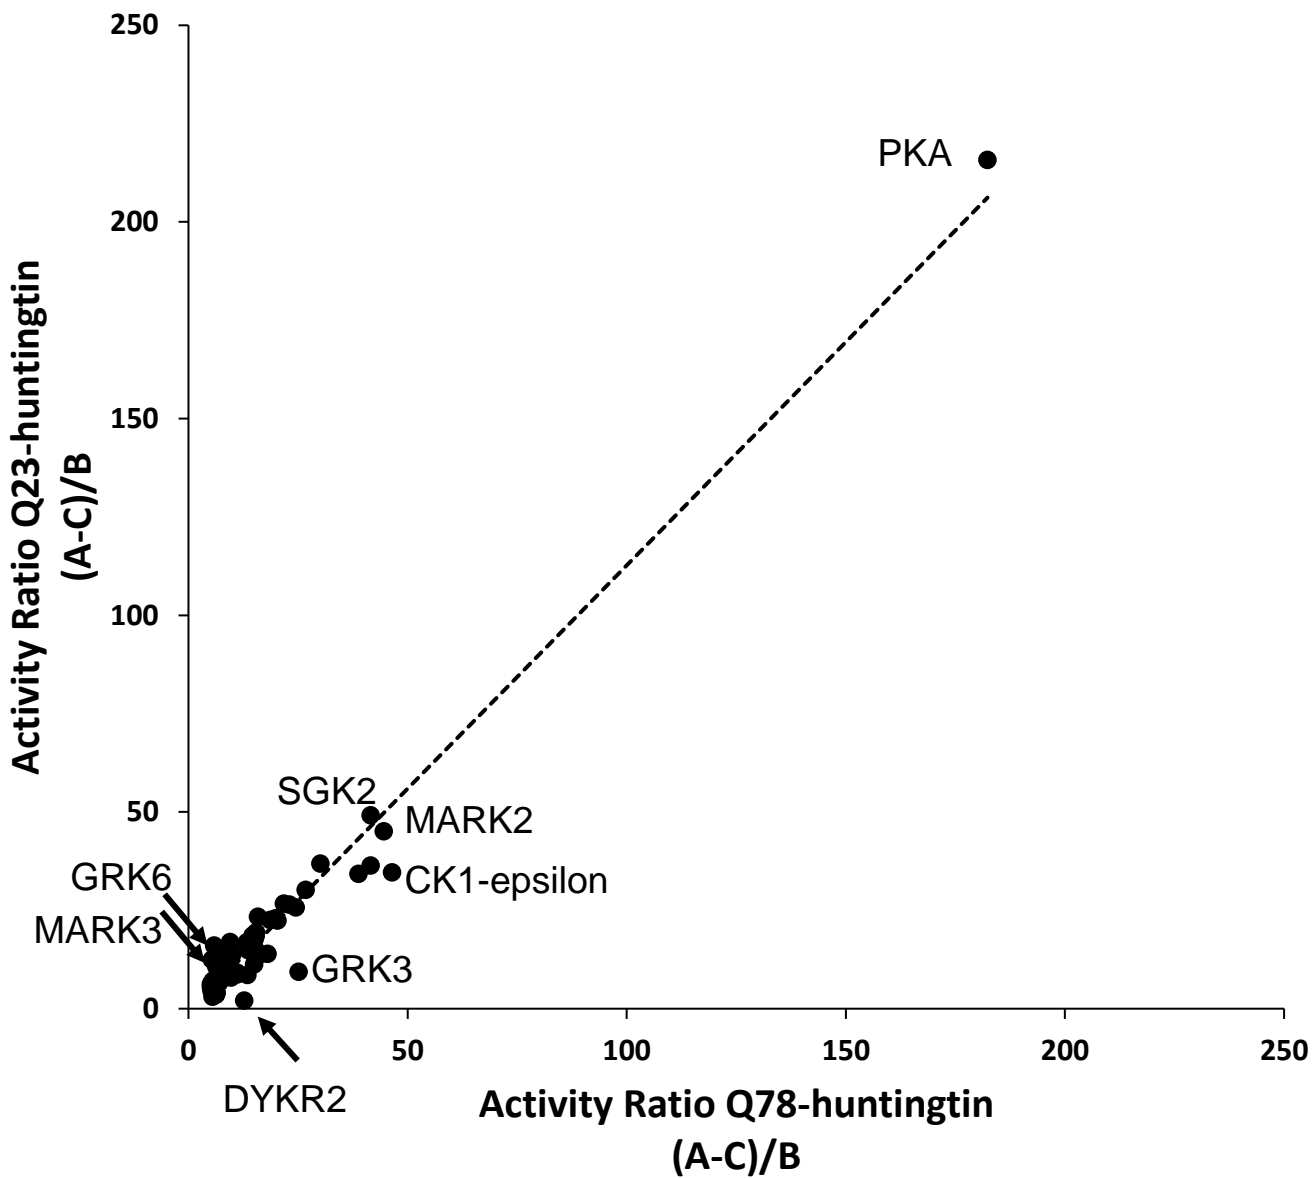

**Figure 4**

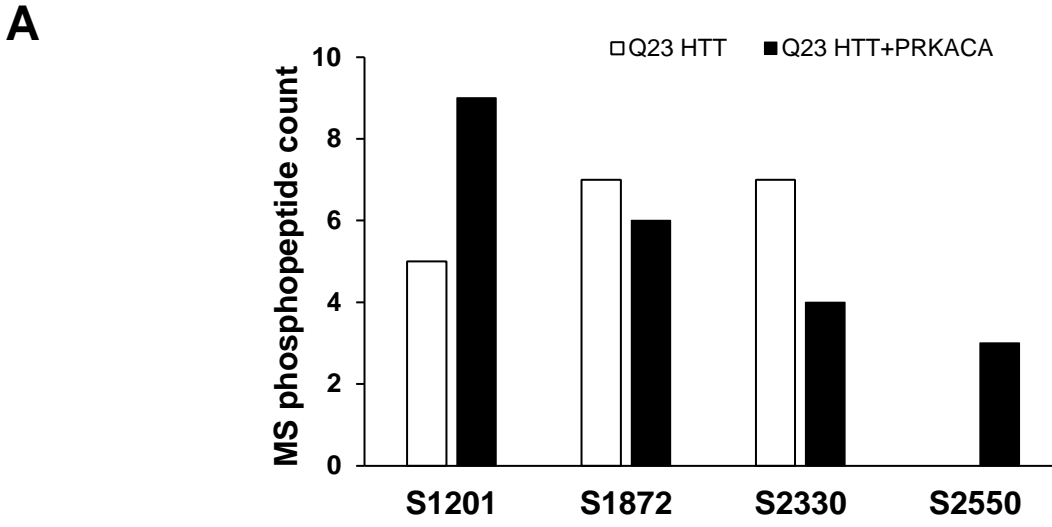

**B**

|                               |               |         |                     |      |
|-------------------------------|---------------|---------|---------------------|------|
| <i>Homo sapiens</i>           | A L D T R F G | R K L S | I I R G I V E Q E I | 2550 |
| <i>Macaca mulatta</i>         | A L D T R F G | R K L S | I I R G I V E Q E I | 2460 |
| <i>Canis lupus familiaris</i> | A L D T R F G | R K L S | I I R G I V E Q E I | 2536 |
| <i>Mus musculus</i>           | A L D T R F G | R K L S | M I R G I V E Q E I | 2526 |
| <i>Danio rerio</i>            | A L D T R F G | R K L S | V I R G M V E R E I | 2520 |

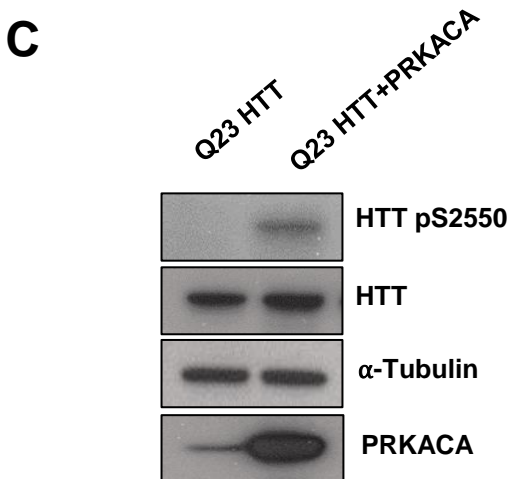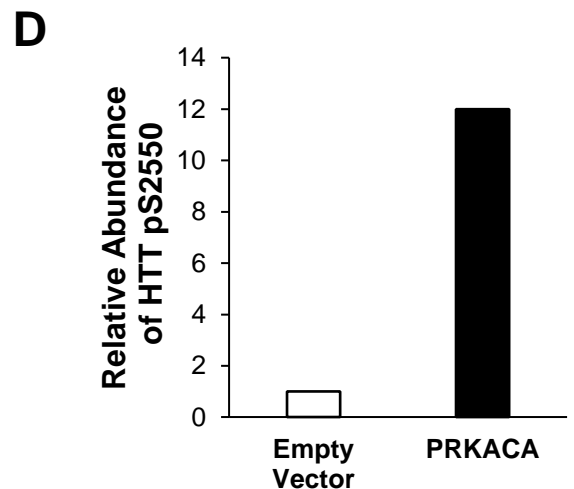

**Figure 5****A**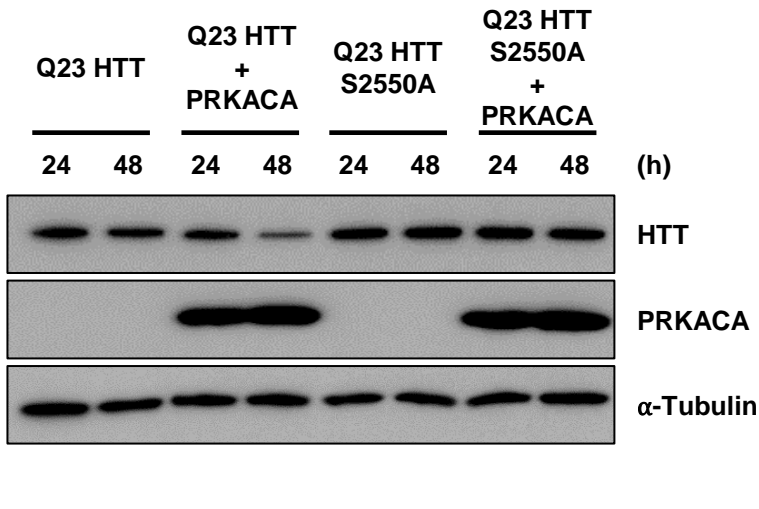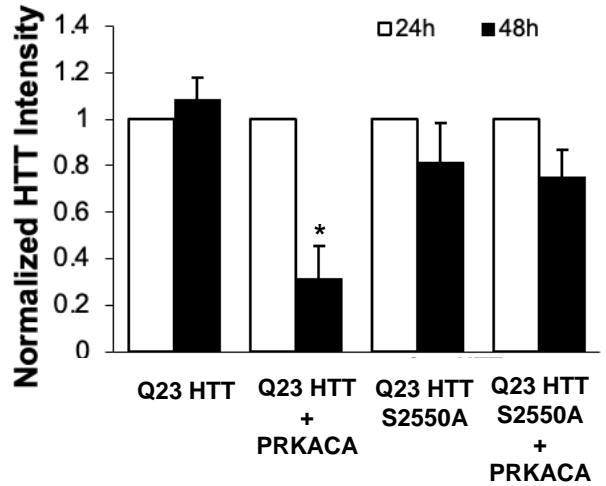**B**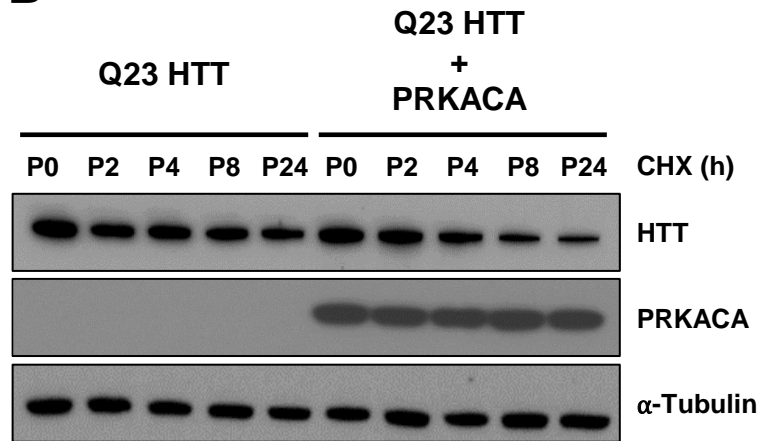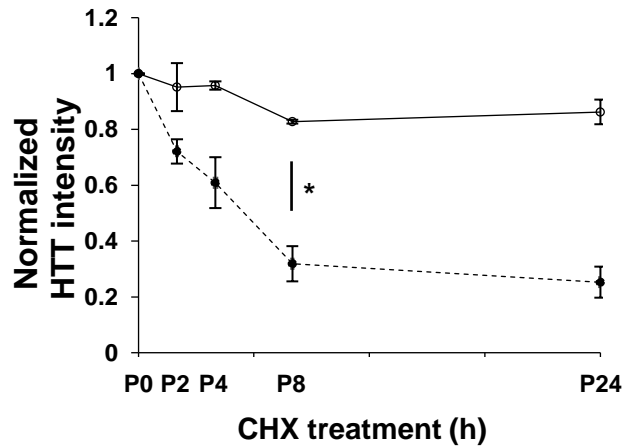**C**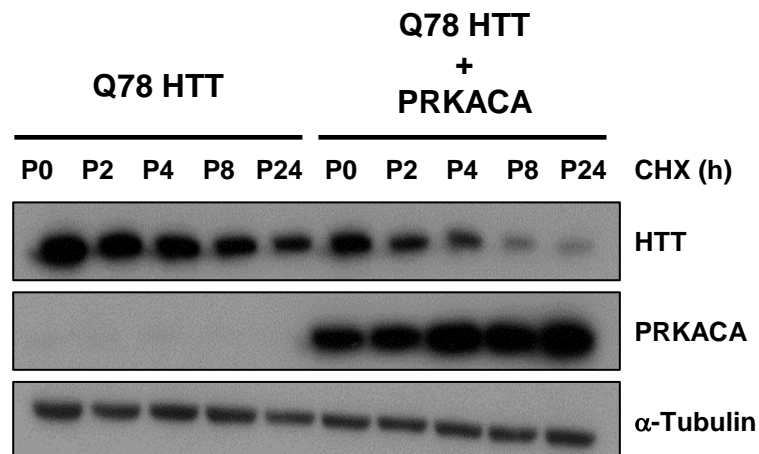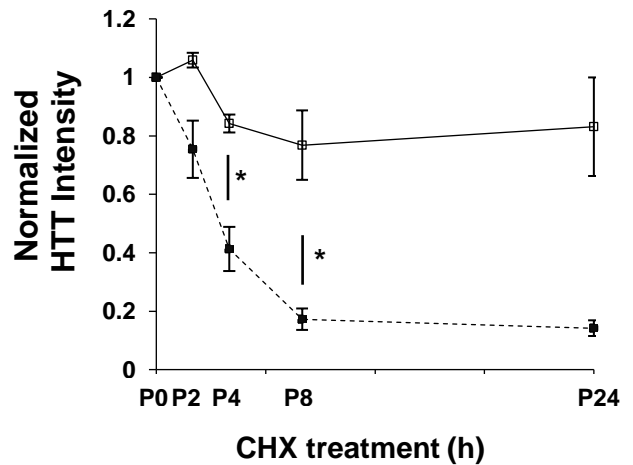

A

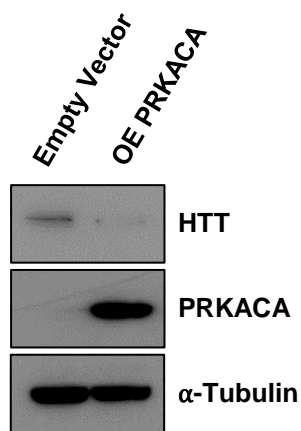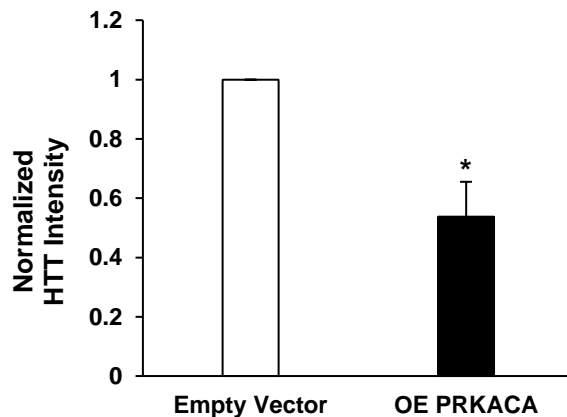

B

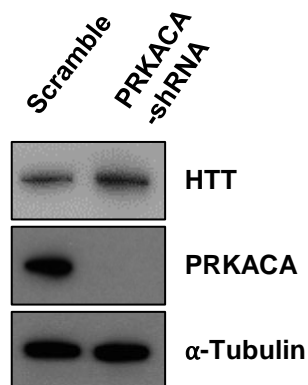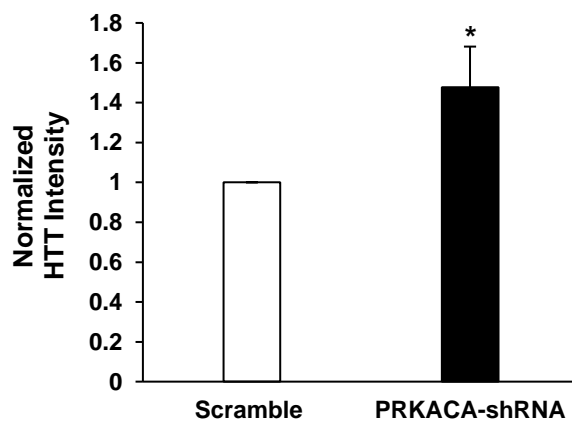

C

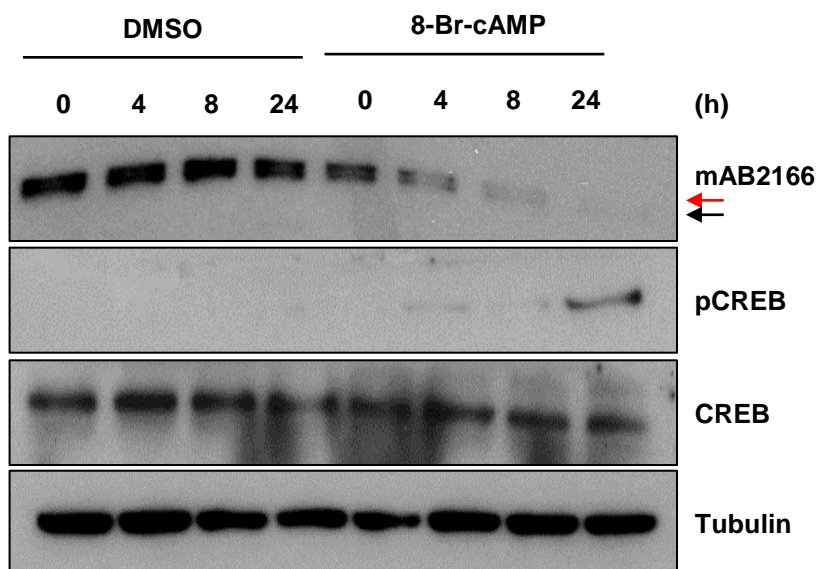

(h)

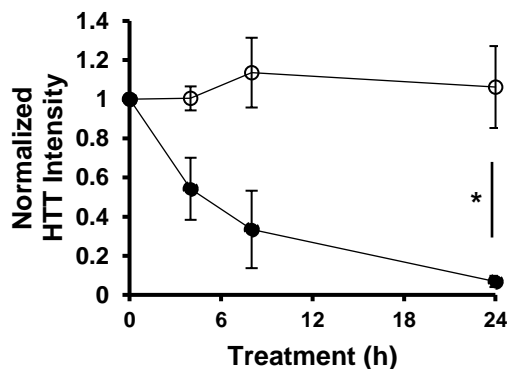

Figure 7

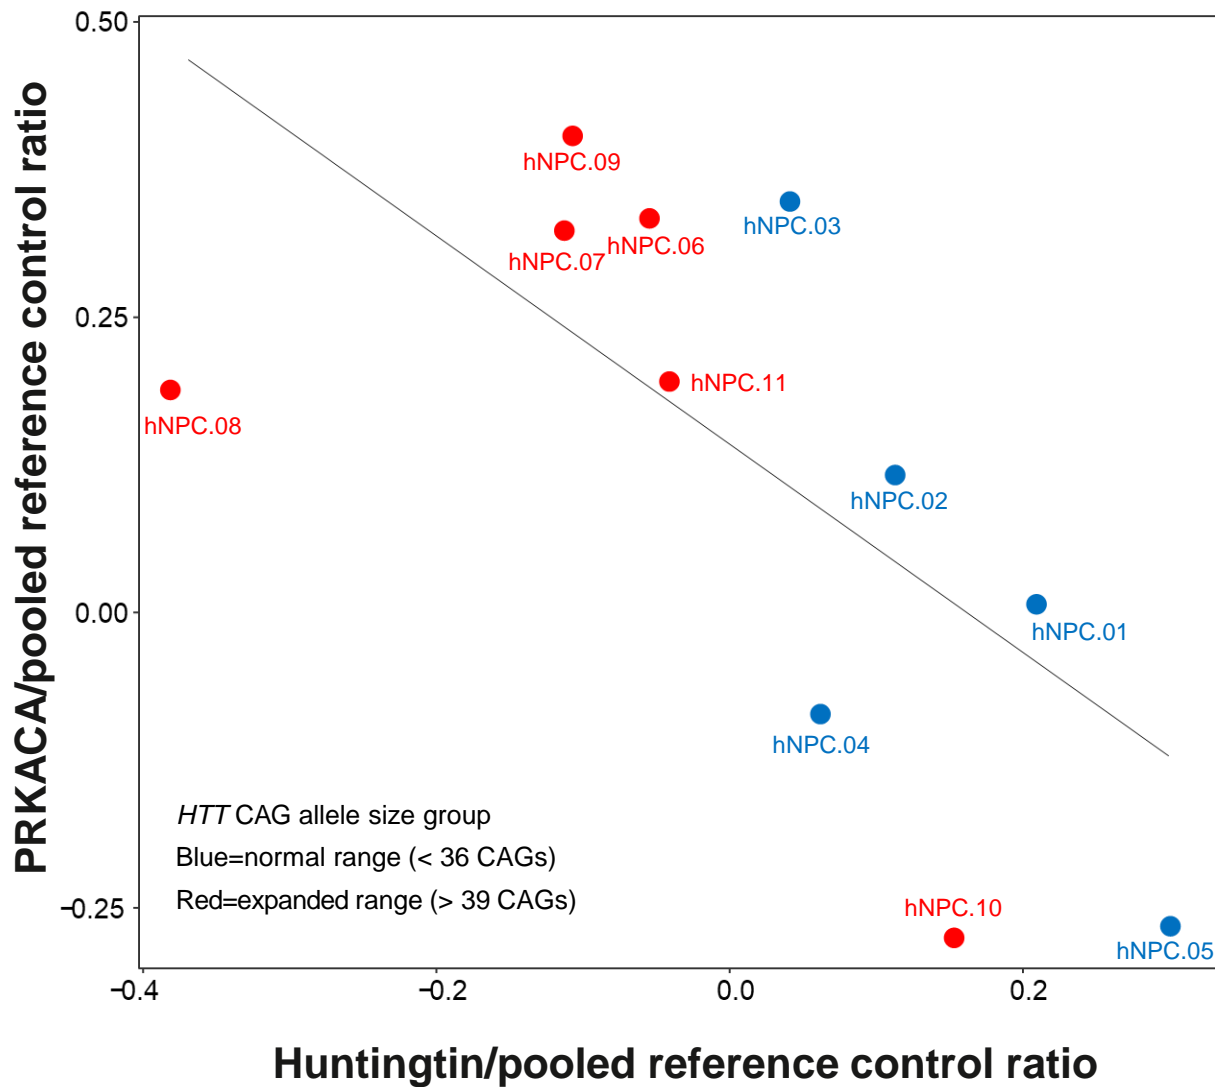

# S. Figure 1

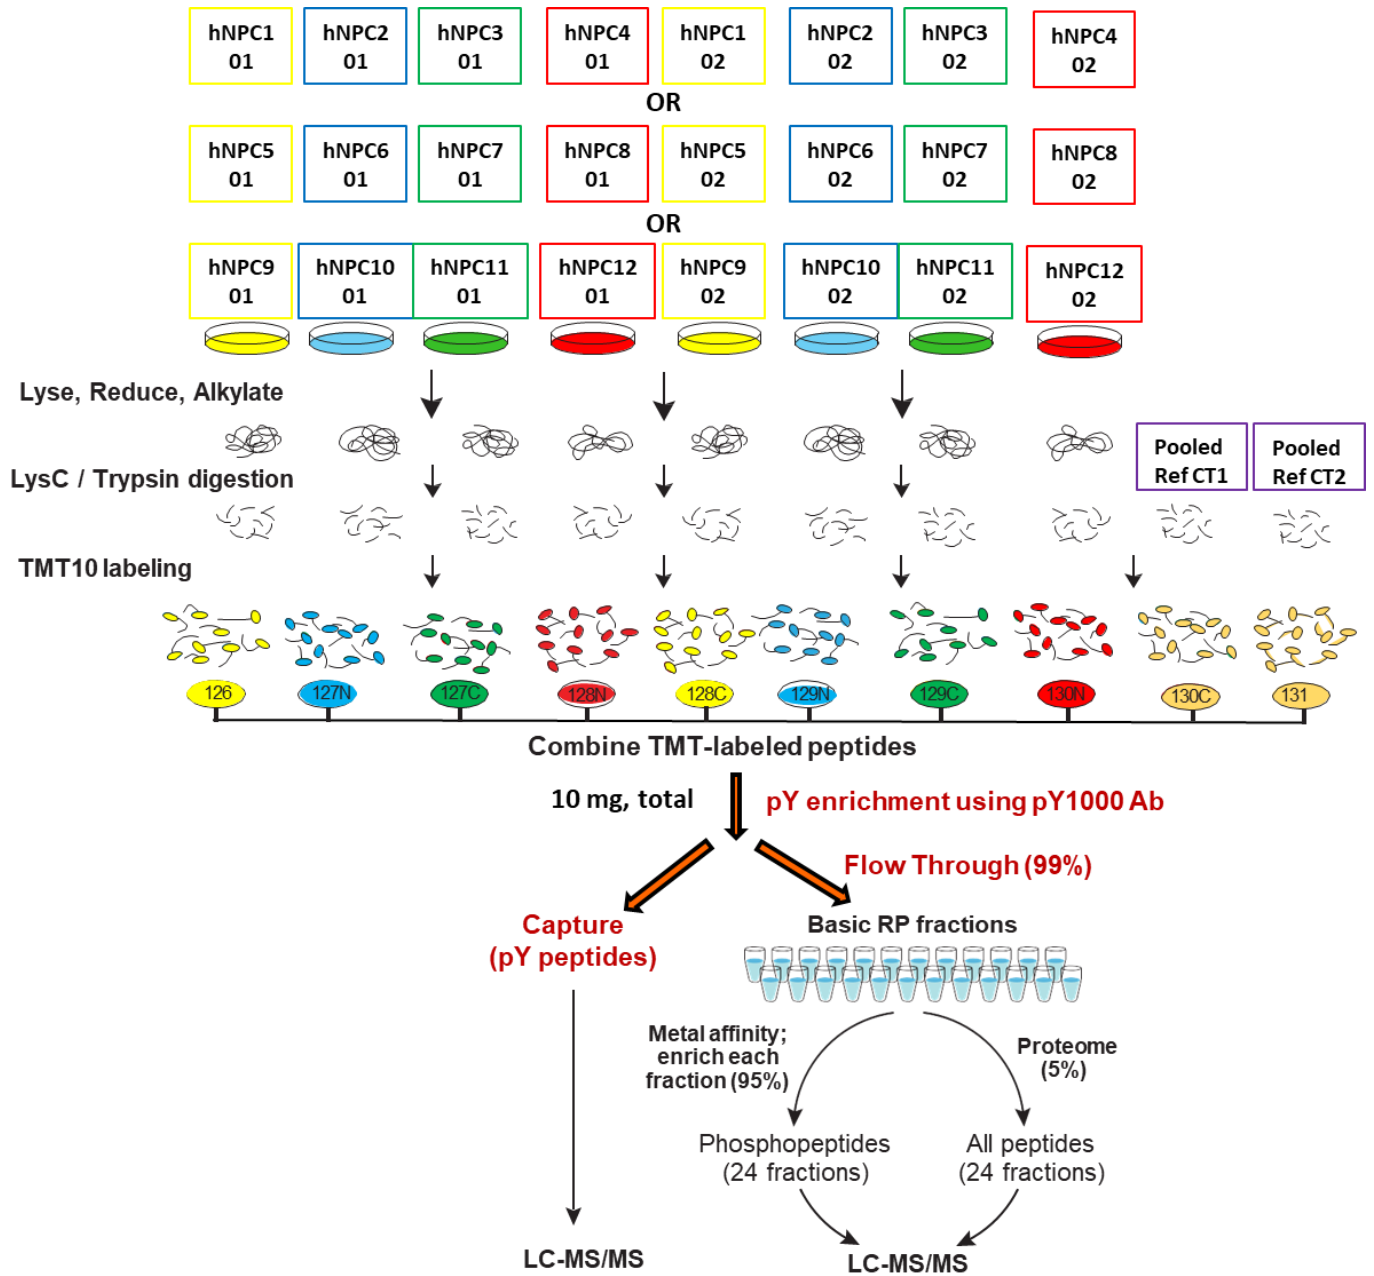

## S. Figure 2

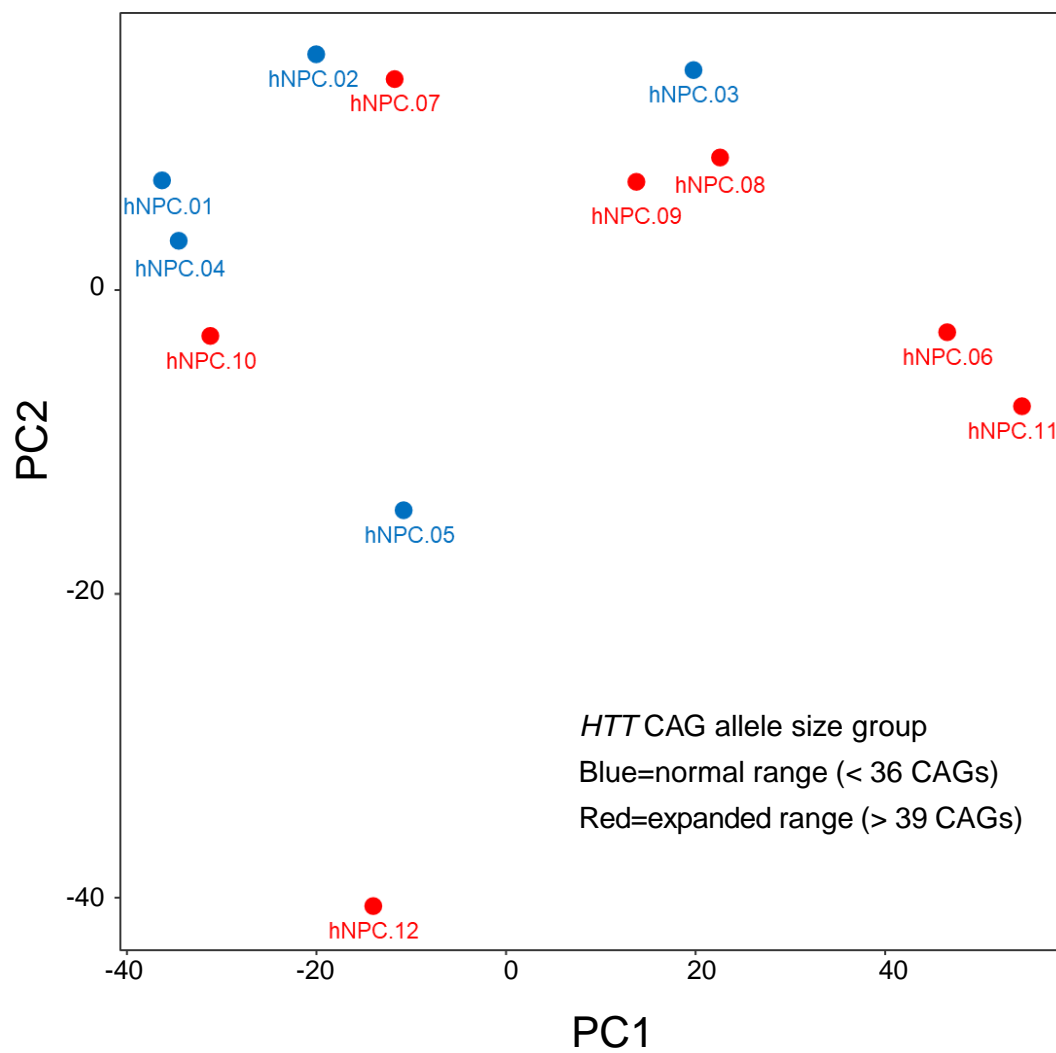



# S. Figure 3

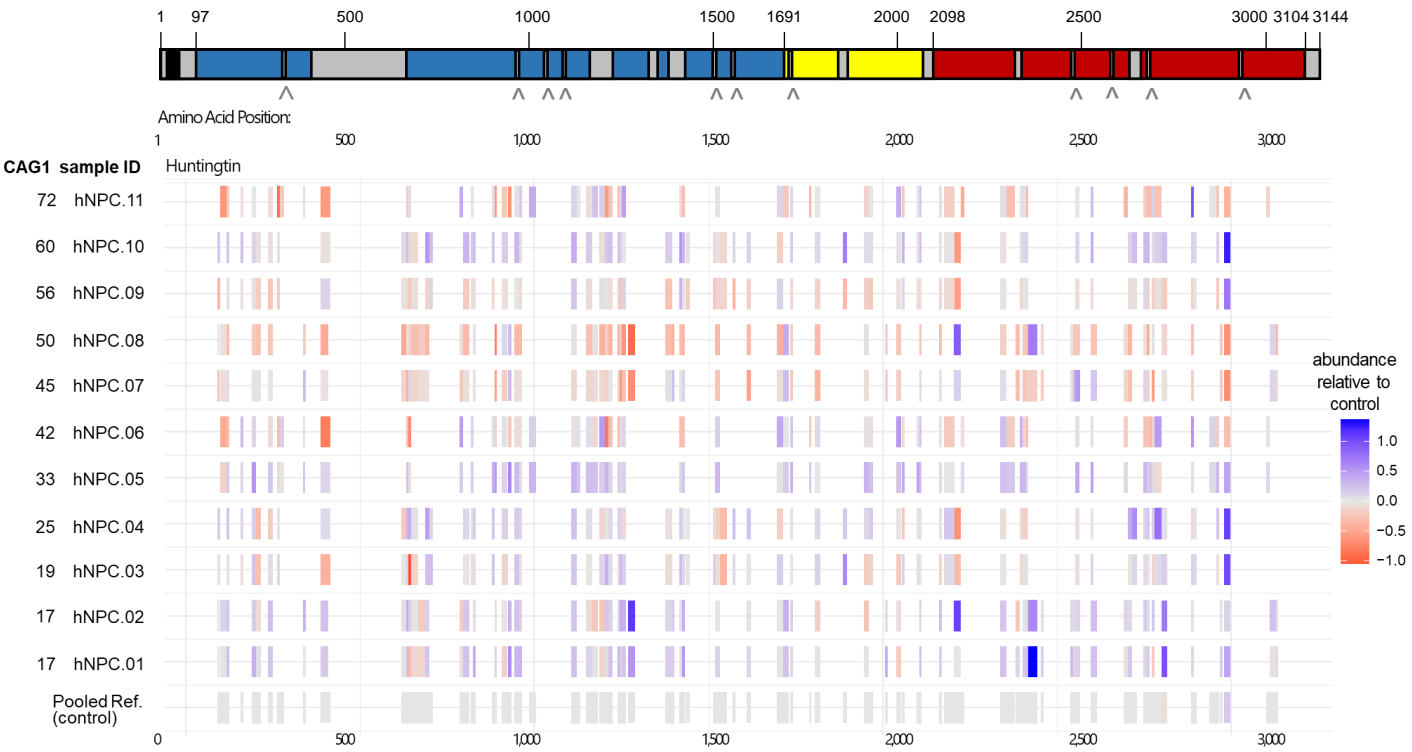

A

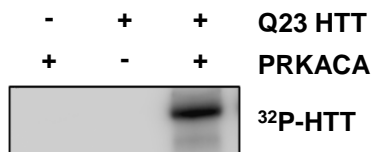

B

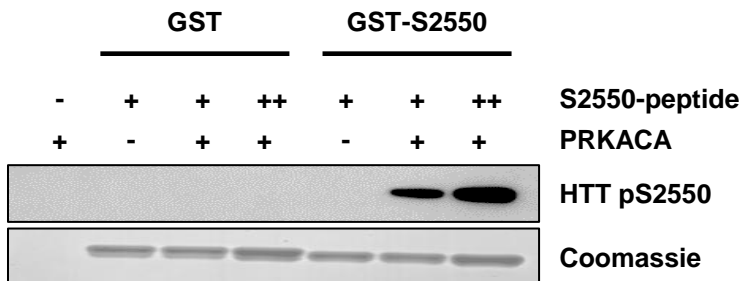

C

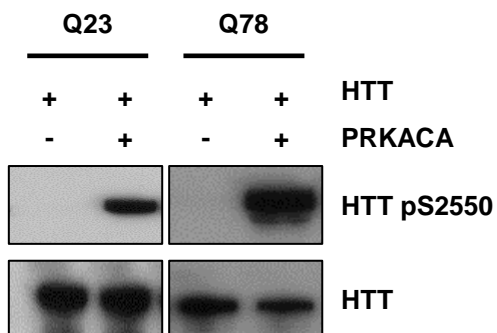

D

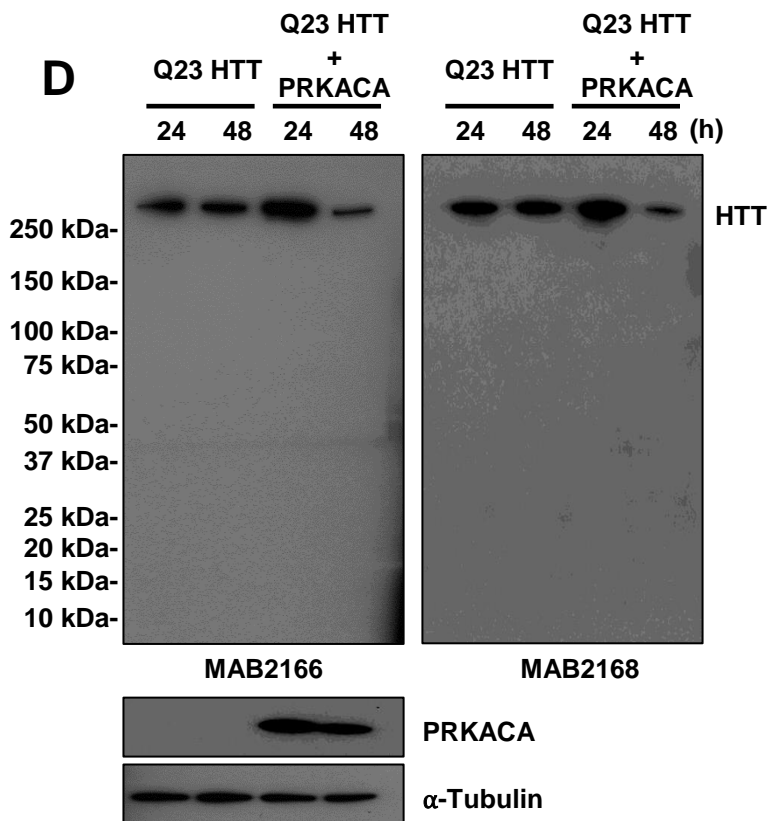

**S. Table 1. Unresolved huntingtin regions in the human huntingtin/HAP40 cryo-EM structure (PDB: 6EZ8)**

| Unresolved huntingtin region (amino acid number: start-end)* | Renumbered for Q23-huntingtin | Length of unresolved region (# residues) | Domain location |
|--------------------------------------------------------------|-------------------------------|------------------------------------------|-----------------|
| 1–90                                                         | 1–96                          | 96                                       | N-HEAT          |
| 323–342                                                      | 329–348                       | 20                                       | N-HEAT          |
| 403–660                                                      | 409–666                       | 258                                      | N-HEAT          |
| 960–977                                                      | 966–983                       | 18                                       | N-HEAT          |
| 1,049–1,057                                                  | 1055–1063                     | 9                                        | N-HEAT          |
| 1,103–1,120                                                  | 1109–1126                     | 18                                       | N-HEAT          |
| 1,158–1,222                                                  | 1164–1228                     | 65                                       | N-HEAT          |
| 1,319–1,347                                                  | 1325–1353                     | 29                                       | N-HEAT          |
| 1,372–1,418                                                  | 1378–1424                     | 47                                       | N-HEAT          |
| 1,504–1,510                                                  | 1510–1516                     | 7                                        | N-HEAT          |
| 1,549–1,556                                                  | 1555–1562                     | 8                                        | N-HEAT          |
| 1,714–1,728                                                  | 1720–1734                     | 15                                       | Bridge          |
| 1,855–1,881                                                  | 1861–1887                     | 27                                       | Bridge          |
| 2,063–2,091                                                  | 2069–2097                     | 29                                       | Bridge          |
| 2,325–2,347                                                  | 2331–2353                     | 23                                       | C-HEAT          |
| 2,472–2,490                                                  | 2478–2496                     | 19                                       | C-HEAT          |
| 2,580–2,582                                                  | 2586–2588                     | 3                                        | C-HEAT          |
| 2,627–2,660                                                  | 2633–2666                     | 34                                       | C-HEAT          |
| 2,681–2,687                                                  | 2687–2693                     | 7                                        | C-HEAT          |
| 2,926–2,944                                                  | 2932–2950                     | 19                                       | C-HEAT          |
| 3,099–3,138                                                  | 3105–3144                     | 40                                       | C-HEAT          |
| <b>Total unresolved region residues:</b>                     |                               | 791                                      |                 |
| *Numbering for 17-polyglutamine huntingtin                   |                               |                                          |                 |

S. Table 2. Comparison of phosphorylation sites

| Phospho-Site | N <sub>589</sub> -Q23 | N <sub>589</sub> -Q46 | N <sub>1192</sub> -Q23 | N <sub>1192</sub> -Q46 | N <sub>1192</sub> -Q78 | C <sub>1213-3144</sub> | Full-length |
|--------------|-----------------------|-----------------------|------------------------|------------------------|------------------------|------------------------|-------------|
| T388         | *√                    | *√                    | *√                     | *√                     | ×                      | NA                     | ×           |
| T396         | *√                    | *√                    | *√                     | ×                      | ×                      | NA                     | ×           |
| T398         | *√                    | *√                    | ×                      | ×                      | ×                      | NA                     | ×           |
| T407         | *√                    | *√                    | *√                     | *√                     | ×                      | NA                     | ×           |
| S413         | √                     | √                     | *√                     | *√                     | ×                      | NA                     | ×           |
| S417         | *√                    | *√                    | *√                     | *√                     | ×                      | NA                     | ×           |
| S419         | *√                    | *√                    | *√                     | *√                     | *√                     | NA                     | ×           |
| S421         | *√                    | *√                    | *√                     | *√                     | *√                     | NA                     | √           |
| S434         | √                     | √                     | √                      | √                      | √                      | NA                     | √           |
| S457         | ×                     | ×                     | ×                      | ×                      | √                      | NA                     | ×           |
| S459         | *√                    | *√                    | √                      | √                      | √                      | NA                     | ×           |
| S461         | *√                    | *√                    | √                      | √                      | √                      | NA                     | ×           |
| S464         | *√                    | *√                    | √                      | ×                      | √                      | NA                     | ×           |
| S465         | *√                    | *√                    | *√                     | *√                     | *√                     | NA                     | ×           |
| S466         | *√                    | *√                    | *√                     | *√                     | *√                     | NA                     | ×           |
| S471         | ×                     | ×                     | ×                      | √                      | √                      | NA                     | ×           |
| S487         | *√                    | ×                     | ×                      | ×                      | ×                      | NA                     | ×           |
| T488         | √                     | √                     | ×                      | ×                      | ×                      | NA                     | ×           |
| S491         | √                     | √                     | √                      | √                      | √                      | NA                     | ×           |
| S642         | NA                    | NA                    | √                      | ×                      | ×                      | NA                     | ×           |
| S691         | NA                    | NA                    | √                      | ×                      | ×                      | NA                     | ×           |
| S805         | NA                    | NA                    | √                      |                        | √                      | NA                     | ×           |
| S960         | NA                    | NA                    | ×                      | √                      | √                      | NA                     | ×           |
| S1109        | NA                    | NA                    | *√                     | ×                      | *√                     | NA                     | ×           |
| S1110        | NA                    | NA                    | *√                     | ×                      | *√                     | NA                     | ×           |
| S1113        | NA                    | NA                    | ×                      | ×                      | √                      | NA                     | ×           |
| S1181        | NA                    | NA                    | √                      | √                      | √                      | NA                     | √           |
| S1201        | NA                    | NA                    | NA                     | NA                     | NA                     | NA                     | √           |
| S1215        | NA                    | NA                    | NA                     | NA                     | NA                     | √                      | ×           |
| S1864        | NA                    | NA                    | NA                     | NA                     | NA                     | √                      | √           |
| S1866        | NA                    | NA                    | NA                     | NA                     | NA                     | √                      | √           |
| S1867        | NA                    | NA                    | NA                     | NA                     | NA                     | ×                      | √           |
| S1872        | NA                    | NA                    | NA                     | NA                     | NA                     | √                      | √           |
| S1876        | NA                    | NA                    | NA                     | NA                     | NA                     | √                      | √           |
| S2076        | NA                    | NA                    | NA                     | NA                     | NA                     | √                      | √           |
| S2114        | NA                    | NA                    | NA                     | NA                     | NA                     | ×                      | √           |
| S2116        | NA                    | NA                    | NA                     | NA                     | NA                     | √                      | √           |
| T2337        | NA                    | NA                    | NA                     | NA                     | NA                     | ×                      | √           |
| S2342        | NA                    | NA                    | NA                     | NA                     | NA                     | ×                      | √           |
| S2423        | NA                    | NA                    | NA                     | NA                     | NA                     | ×                      | √           |
| S2550        | NA                    | NA                    | NA                     | NA                     | NA                     | √                      | √           |

√=Confirmed phosphorylation site; \*√=Ambiguous phosphorylation site; ×=Not phosphorylated  
 NA=Residues not present on product

**Three Supplemental tables below included as three excel files**

**S. Table 3 Huntingtin peptides and phosphopeptides detected from HD hNPC panel**

**S. Table 4. Huntingtin PhosphoSite mass spec all studies**

**S. Table 5. Q23-huntingtin Q78-huntingtin kinase activity data**
